# Supplementary material
Source: ML conference proceedings conference paper supplement (https://openreview.net/forum?id=ARZiMmb619)
Supplement: supplementary_material [file Appendix.pdf › Appendix.pdf]

## 694 A Langevin Convergence Between Strongly Log-concave Distributions

695 In this section, we study the following problem. Let  $p$  be a probability distribution on  $\mathbb{R}^d$ , and let  
 696  $A \in \mathbb{R}^{m \times d}$  be a matrix. For a sequence of parameters  $\eta_i > \eta_{i+1}$  satisfying

$$\eta_i^2 = (1 + \gamma_i)\eta_{i+1}^2,$$

697 consider two random variables  $y_i$  and  $y_{i+1}$  defined as follows. First, draw  $x \sim p$ . Then, generate

$$y_{i+1} = Ax + N(0, \eta_{i+1}^2 I_m),$$

698 and further perturb it by

$$y_i = y_{i+1} + N(0, (\eta_i^2 - \eta_{i+1}^2)I_m).$$

699 Define the score function

$$s_{i+1}(x) = \nabla_x \log p(x \mid y_{i+1}).$$

700 We analyze the following SDE:

$$dx_t = s_{i+1}(x_t) dt + \sqrt{2} dB_t, \quad x_0 \sim p(x \mid y_i). \quad (6)$$

701 This is the ideal (no discretization, no score estimation error) version of the process (2) that we  
 702 actually run. Our goal is to establish the following lemma.

703 **Lemma A.1.** *Suppose the prior distribution  $p(x)$  is  $\alpha$ -strongly log-concave. Then, running the*  
 704 *process (6) for time*

$$T = O\left(\frac{m\gamma_i + \log(\lambda/\varepsilon)}{\alpha}\right)$$

705 ensures that

$$\Pr_{y_i, y_{i+1}} [\text{TV}(x_T, p(x \mid y_{i+1})) \leq \varepsilon] \geq 1 - \frac{1}{\lambda}.$$

### 706 A.1 $\chi^2$ -divergence Between Distributions

707 In this section, our goal is to bound  $\chi^2(p(x \mid y_i) \parallel p(x \mid y_{i+1}))$ . Since the posterior distributions  
 708 can be expressed as

$$p(x \mid y_i) = \frac{p(y_i \mid x)p(x)}{p(y_i)}, \quad p(x \mid y_{i+1}) = \frac{p(y_{i+1} \mid x)p(x)}{p(y_{i+1})}.$$

709 The  $\chi^2$  divergence is

$$\begin{aligned} \chi^2(p(x \mid y_i) \parallel p(x \mid y_{i+1})) &= \mathbb{E}_{x \sim p(x \mid y_i)} \left[ \frac{p(x \mid y_i)}{p(x \mid y_{i+1})} \right] - 1 \\ &= \mathbb{E}_{x \sim p(x \mid y_i)} \left[ \frac{p(y_i \mid x)}{p(y_{i+1} \mid x)} \cdot \frac{p(y_{i+1})}{p(y_i)} \right] - 1 \\ &= \mathbb{E}_{x \sim p(x \mid y_i)} \left[ \frac{p(y_i \mid x)}{p(y_{i+1} \mid x)} \right] \cdot \frac{p(y_{i+1})}{p(y_i)} - 1. \end{aligned}$$

710 We bound the term  $\mathbb{E}_{x \sim p(x \mid y_i)} \left[ \frac{p(y_i \mid x)}{p(y_{i+1} \mid x)} \right]$  first.

711 **Lemma A.2.** *We have*

$$\mathbb{E}_{x, y_i, y_{i+1}} \left[ \frac{p(y_i \mid x)}{p(y_{i+1} \mid x)} \right] = 1$$

712 *Proof.* Let  $Z_1 = y_{i+1} - Ax$ , and let  $Z_2 = y_i - Ax$ . Then we have

$$\mathbb{E}_{x, y_i, y_{i+1}} \left[ \frac{p(y_i \mid x)}{p(y_{i+1} \mid x)} \right] = \mathbb{E}_{Z_1, Z_2} \left[ \frac{p(Z_2)}{p(Z_1)} \right] = \iint \frac{p_{Z_2}(z_2)}{p_{Z_1}(z_1)} \cdot p_{Z_1, Z_2}(z_1, z_2) dz_1 dz_2.$$

713 Note that

$$p_{Z_1, Z_2}(z_1, z_2) = p_{Z_1}(z_1) \cdot f(z_2 - z_1),$$

714 where  $f$  is the density function for  $N(0, (\eta_i^2 - \eta_{i+1}^2)I_m)$ . Therefore,

$$\begin{aligned} \iint \frac{p_{Z_2}(z_2)}{p_{Z_1}(z_1)} \cdot p_{Z_1, Z_2}(z_1, z_2) \, dz_1 \, dz_2 &= \iint p_{Z_2}(z_2) \cdot f(z_2 - z_1) \, dz_1 \, dz_2 \\ &= \int p_{Z_2}(z_2) \left( \int f(z_2 - z_1) \, dz_1 \right) \, dz_2. \end{aligned}$$

715 Since  $f$  is a density function, its integral over  $\mathbb{R}^m$  is 1. This gives that

$$\int p_{Z_2}(z_2) \left( \int f(z_2 - z_1) \, dz_1 \right) \, dz_2 = \int p_{Z_2}(z_2) \, dz_2 = 1.$$

716 Hence,

$$\mathbb{E}_{x, y_i, y_{i+1}} \left[ \frac{p(y_i | x)}{p(y_{i+1} | x)} \right] = 1.$$

717

□

718 **Corollary A.3.** For any  $\lambda > 1$ , we have

$$\Pr_{y_i, y_{i+1}} \left[ \mathbb{E}_{x \sim p(x|y_i)} \left[ \frac{p(y_i | x)}{p(y_{i+1} | x)} \right] \leq \lambda \right] \geq 1 - \frac{1}{\lambda}.$$

719 *Proof.* By Lemma A.2, we have

$$\mathbb{E}_{y_i, y_{i+1}} \left[ \mathbb{E}_{x \sim p(x|y_i)} \left[ \frac{p(y_i | x)}{p(y_{i+1} | x)} \right] \right] = \mathbb{E}_{x, y_i, y_{i+1}} \left[ \frac{p(y_i | x)}{p(y_{i+1} | x)} \right] = 1.$$

720 Applying Markov's inequality gives the result. □

721 Now we bound  $\frac{p(y_{i+1})}{p(y_i)}$ . To make the lemma more self-contained, we abstract this a little bit.

722 **Lemma A.4.** Let  $\eta_1 > \eta_2$  be two positive numbers, and let  $X \in \mathbb{R}^d$  be an arbitrary random  
723 variable. Define  $Y_1 = X + Z_1$  and  $Y_2 = Y_1 + Z_2$ , where  $Z_1 \sim N(0, \eta_1^2 I_d)$  and  $Z_2 \sim N(0, \eta_2^2 I_d)$ .  
724 Then,

$$\mathbb{E}_{Y_1, Y_2} \left[ \frac{p(Y_1)}{p(Y_2)} \right] \leq \frac{1}{\Pr[\|Z_1\| \leq t]} \cdot \exp \left( O \left( \frac{d\eta_2^2}{\eta_1^2} + \frac{t^2\eta_2^2}{\eta_1^4} \right) \right).$$

725 where  $p(Y_1)$  and  $p(Y_2)$  are the densities of  $Y_1$  and  $Y_2$ , respectively.

726 *Proof.* First, we turn to bound

$$F_t(Y_1, Y_2) := \frac{p(Y_1)}{p(Y_2)} \cdot \Pr[\|Z_1\| \leq t \mid Y_1].$$

727 Note that

$$F_t(Y_1, Y_2) = \frac{\int_{\|s - Y_1\| \leq t} p(X = s) p(Y_1 \mid X = s) \, ds}{\int_{\mathbb{R}^d} p(X = s) p(Y_2 \mid X = s) \, ds} = \frac{\int_{\mathbb{R}^d} p_X(s) \phi_{\eta_1^2 I_d}(Y_1 - s) \cdot \mathbf{1}[\|Y_1 - s\| \leq t] \, ds}{\int_{\mathbb{R}^d} p_X(s) \phi_{(\eta_1^2 + \eta_2^2) I_d}(Y_2 - s) \, ds}.$$

728 We have

$$F_t(Y_1, Y_2) \leq \sup_{s \in \mathbb{R}^d} \frac{\phi_{\eta_1^2 I_d}(Y_1 - s) \cdot \mathbf{1}[\|Y_1 - s\| \leq t]}{\phi_{(\eta_1^2 + \eta_2^2) I_d}(Y_2 - s)} \leq \sup_{\|s - Y_1\| \leq t} \frac{\phi_{\eta_1^2 I_d}(Y_1 - s)}{\phi_{(\eta_1^2 + \eta_2^2) I_d}(Y_2 - s)}.$$

729 Write  $Y_1 - s = e_1$ , and note that  $Y_2 - s = e_1 + Z_2$ . Then define

$$G(e_1) = \frac{\phi_{\eta_1^2 I_d}(e_1)}{\phi_{(\eta_1^2 + \eta_2^2) I_d}(e_1 + Z_2)}, \quad \|e_1\| \leq t.$$

730 This gives that for any  $Y_1, Y_2$ , and  $t$ ,

$$F_t(Y_1, Y_2) \leq \sup_{\|e_1\| \leq t} G(e_1).$$

731 **Bounding  $G(e_1)$**  To bound  $\sup_{\|e_1\| \leq t} G(e_1)$ , we expand  $\phi$  as the  $d$ -dimensional Gaussian proba-  
 732 bility density function:

$$G(e_1) = \left( \frac{\eta_1^2 + \eta_2^2}{\eta_1^2} \right)^{d/2} \exp \left( -\frac{\|e_1\|^2}{2\eta_1^2} + \frac{\|e_1 + Z_2\|^2}{2(\eta_1^2 + \eta_2^2)} \right).$$

733 Using the quadratic expansion  $\|e_1 + Z_2\|^2 = \|e_1\|^2 + 2\langle e_1, Z_2 \rangle + \|Z_2\|^2$ , we rewrite:

$$G(e_1) = \left( \frac{\eta_1^2 + \eta_2^2}{\eta_1^2} \right)^{d/2} \exp \left( -\frac{\|e_1\|^2}{2\eta_1^2} + \frac{\|e_1\|^2 + 2\langle e_1, Z_2 \rangle + \|Z_2\|^2}{2(\eta_1^2 + \eta_2^2)} \right).$$

734 Since  $\|e_1\| \leq t$  and  $\langle e_1, Z_2 \rangle \leq \|e_1\| \|Z_2\|$ , we bound

$$\frac{2\langle e_1, Z_2 \rangle}{2(\eta_1^2 + \eta_2^2)} \leq \frac{t\|Z_2\|}{\eta_1^2 + \eta_2^2}.$$

735 Thus,

$$G(e_1) \leq \left( \frac{\eta_1^2 + \eta_2^2}{\eta_1^2} \right)^{d/2} \exp \left( \frac{\|Z_2\|^2}{2(\eta_1^2 + \eta_2^2)} + \frac{t\|Z_2\|}{\eta_1^2 + \eta_2^2} \right).$$

736 Therefore, for any  $Y_1, Y_2$ , and  $t$ , we have

$$F_t(Y_1, Y_2) \leq \left( \frac{\eta_1^2 + \eta_2^2}{\eta_1^2} \right)^{d/2} \exp \left( \frac{\|Z_2\|^2}{2(\eta_1^2 + \eta_2^2)} + \frac{t\|Z_2\|}{\eta_1^2 + \eta_2^2} \right).$$

737 This gives that

$$\begin{aligned} & \mathbb{E}_{Y_1, Y_2 \| \|Z_1\| \leq t} \left[ \frac{p(Y_1)}{p(Y_2)} \right] \\ &= \mathbb{E}_{Y_1, Y_2 \| \|Z_1\| \leq t} \left[ \frac{F_t(Y_1, Y_2)}{\Pr[\|Z_1\| \leq t \mid Y_1]} \right] \\ &\leq \mathbb{E}_{Y_1, Y_2 \| \|Z_1\| \leq t} \left[ \frac{1}{\Pr[\|Z_1\| \leq t \mid Y_1]} \cdot \left( \frac{\eta_1^2 + \eta_2^2}{\eta_1^2} \right)^{d/2} \exp \left( \frac{\|Z_2\|^2}{2(\eta_1^2 + \eta_2^2)} + \frac{t\|Z_2\|}{\eta_1^2 + \eta_2^2} \right) \right] \\ &= \left( \frac{\eta_1^2 + \eta_2^2}{\eta_1^2} \right)^{d/2} \mathbb{E}_{Y_1 \| \|Z_1\| \leq t} \left[ \frac{1}{\Pr[\|Z_1\| \leq t \mid Y_1]} \right] \cdot \mathbb{E}_{Z_2} \left[ \exp \left( \frac{\|Z_2\|^2}{2(\eta_1^2 + \eta_2^2)} + \frac{t\|Z_2\|}{\eta_1^2 + \eta_2^2} \right) \right]. \end{aligned}$$

738 **Bounding expectation over  $Z_2$ .** We have

$$\mathbb{E}_{Z_2} \left[ \exp \left( \frac{\|Z_2\|^2}{2(\eta_1^2 + \eta_2^2)} + \frac{t\|Z_2\|}{\eta_1^2 + \eta_2^2} \right) \right] = \mathbb{E}_{Z \sim \mathcal{N}(0, I_d)} \left[ \exp \left( \frac{\eta_2^2 \|Z\|^2}{2(\eta_1^2 + \eta_2^2)} + \frac{t\eta_2 \|Z\|}{\eta_1^2 + \eta_2^2} \right) \right].$$

739 We can apply results on the Gaussian moment generating functions to bound this. Us-

740 ing Lemma A.10 by setting  $\alpha = \frac{\eta_2^2}{2(\eta_1^2 + \eta_2^2)}$ ,  $\beta = \frac{t\eta_2}{\eta_1^2 + \eta_2^2}$ , and  $\gamma = \frac{\eta_1^2}{4(\eta_1^2 + \eta_2^2)}$ , we have

$$\mathbb{E}_{Z \sim \mathcal{N}(0, I_d)} \left[ \exp \left( \frac{\eta_2^2 \|Z\|^2}{2(\eta_1^2 + \eta_2^2)} + \frac{t\eta_2 \|Z\|}{\eta_1^2 + \eta_2^2} \right) \right] \leq \exp \left( \frac{t^2 \eta_2^2}{\eta_1^2 (\eta_1^2 + \eta_2^2)} \right) \cdot \left( \frac{2(\eta_1^2 + \eta_2^2)}{\eta_1^2} \right)^{d/2}.$$

741 Finally, this gives

$$\mathbb{E}_{Y_1, Y_2 \| \|Z_1\| \leq t} \left[ \frac{p(Y_1)}{p(Y_2)} \right] \leq \frac{1}{\Pr[\|Z_1\| \leq t]} \cdot \exp \left( O \left( \frac{d\eta_2^2}{\eta_1^2} + \frac{t^2 \eta_2^2}{\eta_1^4} \right) \right).$$

742 One need to verify that

$$\mathbb{E}_{Y_1 \| \|Z_1\| \leq t} \left[ \frac{1}{\Pr[\|Z_1\| \leq t \mid Y_1]} \right] \leq \frac{1}{\Pr[\|Z_1\| \leq t]}.$$

743 Also,

$$\mathbb{E}_{Z_2} [F_t(Y_1, Y_2)] \leq \exp \left( O \left( \frac{d\eta_2^2}{\eta_1^2} + \frac{t\eta_2 \sqrt{d}}{\eta_1^2} \right) \right).$$

744 This gives the result.  $\square$

**Lemma A.5.** Let  $\eta_1 > \eta_2$  be two positive numbers, and let  $X \in \mathbb{R}^d$  be an arbitrary random variable. Define  $Y_1 = X + Z_1$  and  $Y_2 = Y_1 + Z_2$ , where  $Z_1 \sim N(0, \eta_1^2 I_d)$  and  $Z_2 \sim N(0, \eta_2^2 I_d)$ . There exists a constant  $C > 0$  such that for any  $\lambda > 1$ ,

$$\Pr_{Y_1, Y_2} \left[ \frac{p(Y_1)}{p(Y_2)} \leq \exp \left( C \cdot \left( \frac{d\eta_2^2}{\eta_1^2} + \ln \lambda \right) \right) \right] \geq 1 - \frac{1}{\lambda}.$$

where  $p(Y_1)$  and  $p(Y_2)$  are the densities of  $Y_1$  and  $Y_2$ , respectively.

*Proof.* Let  $t = (\sqrt{d} + \sqrt{2 \ln(2\lambda)})\eta_1$ . By applying Laurent-Massart bounds (Lemma A.11), we have

$$\Pr[\|Z_1\| \leq t] \geq 1 - \frac{1}{2\lambda}.$$

Taking these into Lemma A.4, we have

$$\mathbb{E}_{Y_1, Y_2 | \|Z_1\| \leq t} \left[ \frac{p(Y_1)}{p(Y_2)} \right] \leq \exp \left( O \left( \frac{d\eta_2^2}{\eta_1^2} + \frac{t^2 \eta_2^2}{\eta_1^4} \right) \right) \leq \exp \left( O \left( \frac{(d + \ln \lambda) \eta_2^2}{\eta_1^2} \right) \right).$$

By applying Markov's inequality, for a large enough constant  $C > 0$ , we have

$$\Pr_{Y_1, Y_2 | \|Z_1\| \leq t} \left[ \frac{p(Y_1)}{p(Y_2)} \leq \lambda \exp \left( C \cdot \left( \frac{(d + \ln \lambda) \eta_2^2}{\eta_1^2} \right) \right) \right] \geq 1 - \frac{1}{2\lambda}.$$

Cleaning up the bound a little bit, this implies that for a large enough constant  $C > 0$ ,

$$\Pr_{Y_1, Y_2 | \|Z_1\| \leq t} \left[ \frac{p(Y_1)}{p(Y_2)} \leq \exp \left( C \cdot \left( \frac{d\eta_2^2}{\eta_1^2} + \ln \lambda \right) \right) \right] \geq 1 - \frac{1}{2\lambda}.$$

Combining this with the probability that  $\|Z\| \leq t$ , a union bound gives that

$$\Pr_{Y_1, Y_2} \left[ \frac{p(Y_1)}{p(Y_2)} \leq \exp \left( C \cdot \left( \frac{d\eta_2^2}{\eta_1^2} + \ln \lambda \right) \right) \right] \geq 1 - \frac{1}{\lambda}.$$

□

The  $\chi^2$  divergence is

$$\begin{aligned} \chi^2(p(x | y_i) \| p(x | y_{i+1})) &= \mathbb{E}_{x \sim p(x | y_i)} \left[ \frac{p(x | y_i)}{p(x | y_{i+1})} \right] - 1 \\ &= \mathbb{E}_{x \sim p(x | y_i)} \left[ \frac{p(y_i | x)}{p(y_{i+1} | x)} \cdot \frac{p(y_{i+1})}{p(y_i)} \right] - 1 \\ &= \mathbb{E}_{x \sim p(x | y_i)} \left[ \frac{p(y_i | x)}{p(y_{i+1} | x)} \right] \cdot \frac{p(y_{i+1})}{p(y_i)} - 1. \end{aligned}$$

Now we can bound the  $\chi^2$ -diversity.

**Lemma A.6.** There exists a constant  $C > 0$  such that for any  $\lambda > 1$ ,

$$\Pr_{y_i, y_{i+1}} \left[ \chi^2(p(x | y_i) \| p(x | y_{i+1})) \leq \exp \left( C \left( \frac{m(\eta_i^2 - \eta_{i+1}^2)}{\eta_{i+1}^2} + \ln \lambda \right) \right) \right] \geq 1 - \frac{1}{\lambda}.$$

*Proof.* Note that

$$\chi^2(p(x | y_i) \| p(x | y_{i+1})) = \mathbb{E}_{x \sim p(x | y_i)} \left[ \frac{p(y_i | x)}{p(y_{i+1} | x)} \right] \cdot \frac{p(y_{i+1})}{p(y_i)} - 1.$$

By Corollary A.3, we have

$$\Pr_{y_i, y_{i+1}} \left[ \mathbb{E}_{x \sim p(x | y_i)} \left[ \frac{p(y_i | x)}{p(y_{i+1} | x)} \right] \leq 2\lambda \right] \geq 1 - \frac{1}{2\lambda}.$$

By Lemma A.5, there exists a constant  $C > 0$  such that

$$\Pr_{Y_1, Y_2} \left[ \frac{p(Y_1)}{p(Y_2)} \leq \exp \left( C \left( \frac{m(\eta_i^2 - \eta_{i+1}^2)}{\eta_{i+1}^2} + \ln \lambda \right) \right) \right] \geq 1 - \frac{1}{2\lambda}.$$

A union bound over these two implies that with probability of  $1 - 1/\lambda$ ,

$$\frac{p(y_i | x)}{p(y_{i+1} | x)} \cdot \frac{p(y_{i+1})}{p(y_i)} - 1 \leq 2\lambda \cdot \exp \left( C \left( \frac{m(\eta_i^2 - \eta_{i+1}^2)}{\eta_{i+1}^2} + \ln \lambda \right) \right) \leq \exp \left( C' \left( \frac{m(\eta_i^2 - \eta_{i+1}^2)}{\eta_{i+1}^2} + \ln \lambda \right) \right),$$

where  $C'$  is a positive constant. This concludes the lemma. □

## 763 A.2 Convergence time of Langevin dynamics

764 We present the following result on the convergence of Langevin dynamics:

765 **Lemma A.7** ([Dal17]). *Let  $p$  and  $q$  be probability distributions such that  $q$  is an  $\alpha$ -strong log-*  
766 *concave distribution. Consider the Langevin dynamics initialized with  $p$  as the starting distribution.*  
767 *Then, for any  $t \geq 0$ , we have*

$$\text{TV}(p_t, q) \leq \frac{1}{2} \chi^2(p \parallel q)^{1/2} e^{-t\alpha/2}.$$

768 This implies that

769 **Lemma A.8.** *Let  $p$  and  $q$  be probability distributions such that  $q$  is an  $\alpha$ -strong log-concave distri-*  
770 *bution. Consider the Langevin dynamics initialized with  $p$  as the starting distribution. By running*  
771 *the diffusion for time*

$$T = O\left(\frac{\log(1/\varepsilon) + \log \chi^2(p \parallel q)}{\alpha}\right),$$

772 *we have  $\text{TV}(p_T, q) \leq \varepsilon$ .*

773 Now we show that the posterior distribution is even more strongly log-concave than prior distribu-  
774 tion.

775 **Lemma A.9.** *Suppose that  $p(x)$  is  $\alpha$ -strongly log-concave. Then, the posterior density*

$$p(x \mid Ax + N(\eta_i^2 I_m) = y_i)$$

776 *is  $\alpha$ -strongly log-concave.*

777 *Proof.* By Bayes' rule, the posterior density can be written (up to normalization) as

$$p(x \mid Ax + N(\eta_i^2 I_m) = y_i) \propto p(x) \exp\left(-\frac{1}{2\eta_i^2} \|Ax - y_i\|_2^2\right).$$

778 Define the negative log-posterior

$$\varphi(x) := -\log p(x) + \frac{1}{2\eta_i^2} \|Ax - y_i\|_2^2.$$

779 Since  $p$  is  $\alpha$ -strongly log-concave, its negative log-density satisfies

$$\nabla^2(-\log p(x)) \succeq \alpha I.$$

780 Moreover, the Gaussian likelihood term has

$$\nabla^2\left(\frac{1}{2\eta_i^2} \|Ax - y_i\|_2^2\right) = \frac{1}{\eta_i^2} A^T A \succeq 0.$$

781 By the sum rule for Hessians,

$$\nabla^2 \varphi(x) = \nabla^2(-\log p(x)) + \frac{1}{\eta_i^2} A^T A \succeq \alpha I.$$

782 Hence  $\varphi$  is  $\alpha$ -strongly convex, and the posterior density  $p(x \mid Ax + N(\eta_i^2 I_m) = y_i) \propto e^{-\varphi(x)}$  is  
783  $\alpha$ -strongly log-concave.  $\square$

784 Now we are ready to prove [Lemma A.1](#):

785 *Proof of Lemma A.1.* By [Lemma A.9](#),  $p(x \mid y_{i+1})$  is  $\alpha$ -strongly log-concave. This allows us to  
786 apply [Lemma A.8](#). Therefore, to achieve  $\varepsilon$  TV error in convergence, we only need to run the process  
787 for

$$T = O\left(\frac{\log(1/\varepsilon) + \log \chi^2(p(x \mid y_i) \parallel p(x \mid y_{i+1}))}{\alpha}\right).$$

788 Taking in the result in [Lemma A.6](#), we have with  $1 - \frac{1}{\lambda}$  probability over  $y_i$  and  $y_{i+1}$ , we only need

$$T = O\left(\frac{m\gamma_i + \log(\lambda/\varepsilon)}{\alpha}\right).$$

789  $\square$

### 790 A.3 Utility Lemmas.

791 **Lemma A.10.** *Let  $Z \sim \mathcal{N}(0, I_d)$  be a  $d$ -dimensional standard Gaussian random vector, and let*  
 792  *$\alpha, \beta \in \mathbb{R}$ . For any  $\gamma > 0$  satisfying  $\alpha + \gamma < \frac{1}{2}$ , we have*

$$\mathbb{E} \left[ \exp \left( \alpha \|Z\|^2 + \beta \|Z\| \right) \right] \leq \exp \left( \frac{\beta^2}{4\gamma} \right) (1 - 2(\alpha + \gamma))^{-d/2}.$$

793 *Proof.* For all  $r \geq 0$  and any  $\gamma > 0$ , it is easy to check that by AM-GM inequality,

$$\beta r \leq \gamma r^2 + \frac{\beta^2}{4\gamma}.$$

794 Taking  $r = \|Z\|$  and exponentiating both sides, we obtain

$$\exp(\beta \|Z\|) \leq \exp \left( \gamma \|Z\|^2 + \frac{\beta^2}{4\gamma} \right).$$

795 Multiplying both sides by  $\exp(\alpha \|Z\|^2)$  yields

$$\exp(\alpha \|Z\|^2 + \beta \|Z\|) \leq \exp \left( \frac{\beta^2}{4\gamma} \right) \exp((\alpha + \gamma) \|Z\|^2).$$

796 This gives that

$$\mathbb{E} \left[ \exp(\alpha \|Z\|^2 + \beta \|Z\|) \right] \leq \exp \left( \frac{\beta^2}{4\gamma} \right) \mathbb{E} \left[ \exp((\alpha + \gamma) \|Z\|^2) \right].$$

797 For  $Z \sim \mathcal{N}(0, I_d)$ , when  $\alpha + \gamma < \frac{1}{2}$  we have

$$\mathbb{E} \left[ \exp((\alpha + \gamma) \|Z\|^2) \right] = (1 - 2(\alpha + \gamma))^{-d/2},$$

798 Hence,

$$\mathbb{E} \left[ \exp(\alpha \|Z\|^2 + \beta \|Z\|) \right] \leq \exp \left( \frac{\beta^2}{4\gamma} \right) (1 - 2(\alpha + \gamma))^{-d/2}.$$

799

□

800 **Lemma A.11** (Laurent-Massart Bounds[LM00]). *Let  $v \sim \mathcal{N}(0, I_m)$ . For any  $t > 0$ ,*

$$\Pr[\|v\|^2 - m \geq 2\sqrt{mt} + 2t] \leq e^{-t},$$

801

$$\Pr[\|v\|^2 - m \leq -2\sqrt{mt}] \leq e^{-t}.$$

## 802 B Convergence Between Locally Well-Conditioned Distributions

803 In the last section, we considered the convergence time between two posterior distributions of a  
 804 globally strongly log-concave distribution. In this section, we will relax the assumption of global  
 805 strong log-concavity and consider the convergence time between two distributions that are locally  
 806 “well-behaved”. We give the following formal definition:

807 **Definition B.1.** *For  $\delta \in [0, 1)$  and  $R, \tilde{L}, \alpha \in (0, +\infty]$ , we say that a distribution  $p$  is  $(\delta, r, R, \tilde{L}, \alpha)$*   
 808 *mode-centered locally well-conditioned if there exists  $\theta$  such that*

809 •  $\nabla \log p(\theta) = 0.$

810 •  $\Pr_{x \sim p}[x \in B(\theta, r)] \geq 1 - \delta.$

811 • For  $x, y \in B(\theta, R)$ , we have that  $\|s(x) - s(y)\| \leq \tilde{L}\alpha \|x - y\|.$

812 • For  $x, y \in B(\theta, R)$ , we have that  $\langle s(y) - s(x), x - y \rangle \geq \alpha \|x - y\|^2.$

813 Again, we consider the following process  $P$ , which is identical to process (6) we considered in the  
 814 last section:

$$dx_t = \left( s(x_t) + \frac{A^T y_{i+1} - A^T A x_t}{\eta_{i+1}^2} \right) dt + \sqrt{2} dB_t, \quad x_0 \sim p(x \mid y_i)$$

815 Our goal is to prove the following lemma:

816 **Lemma B.2.** *Suppose  $p$  is a  $(\delta, r, R, \tilde{L}, \alpha)$  mode-centered locally well-conditioned distribution. Let*  
 817  *$C > 0$  be a large enough constant. We consider the process  $P$  running for time*

$$T \geq C \left( \frac{m\gamma_i + \log(\lambda/\varepsilon)}{\alpha} \right).$$

818 *Suppose that*

$$R \geq r + \frac{T\|A\|}{\eta_{i+1}^2} \left( \|A\|r + \eta_{i+1}(\sqrt{m} + \sqrt{2\ln(1/\delta)}) \right) + 2\sqrt{dT\ln(2d/\delta)}.$$

819 *Then  $x_T \sim P_T$  satisfies that*

$$\Pr_{y_i, y_{i+1}} [\text{TV}(x_T, p(x \mid y_{i+1})) \leq \varepsilon + \lambda\delta] \geq 1 - O(\lambda^{-1}).$$

820 In this section, we will assume that  $p$  is  $(\delta, r, R, \tilde{L}, \alpha)$  mode-centered locally well-conditioned.  
 821 Without loss of generality, we assume that the mode of  $p$  is at 0, i.e.,  $\theta = 0$ .

## 822 B.1 High Probability Boundness of Langevin Dynamics

823 We consider the process  $P'$  defined as the process  $P$  conditioned on  $x_t \in B(0, R)$  for  $t \in [0, T]$ .

824 Our goal is to prove the following lemma:

825 **Lemma B.3.** *Suppose the following holds:*

$$R \geq r + \frac{T\|A\|}{\eta_{i+1}^2} \left( \|A\|r + \eta_{i+1}(\sqrt{m} + \sqrt{2\ln(1/\delta)}) \right) + 2\sqrt{dT\ln(2d/\delta)}.$$

826 *We have that*

$$\mathbb{E} [\text{TV}(P, P')] \lesssim \delta.$$

827 We start by decomposing the total variation distance between  $P$  and  $P'$  as follows:

828 **Lemma B.4.** *We have that*

$$\mathbb{E} [\text{TV}(P, P')] \leq \mathbb{E}_{y_i, y_{i+1}} \left[ \Pr_P \left[ \exists t \in [0, T] : \|x_t\| \geq R \mid x_0 \in B(0, r) \right] \right] + \delta.$$

829 *Proof.* Recall that the process  $P'$  is defined as the law of  $P$  conditioned on the event

$$\mathcal{F} := \{x_t \in B(0, R) \text{ for all } t \in [0, T]\}.$$

830 Thus, for any fixed  $y_i$  we have

$$\text{TV}(P, P') = \text{TV}(P, P(\cdot \mid \mathcal{F})) = 1 - P(\mathcal{F}) = P(\mathcal{F}^c),$$

831 where  $\mathcal{F}^c = \{\exists t \in [0, T] : \|x_t\| \geq R\}$ .

832 Let  $\mathcal{E} := \{x_0 \in B(0, r)\}$  denote the event that the initial condition is “good.” Then, by the law of  
 833 total probability,

$$P(\mathcal{F}^c) = P(\mathcal{F}^c \cap \mathcal{E}) + P(\mathcal{F}^c \cap \mathcal{E}^c) \leq P(\mathcal{F}^c \mid \mathcal{E}) + P(\mathcal{E}^c).$$

834 Taking the expectation with respect to  $y_i$  and  $y_{i+1}$ , we obtain

$$\mathbb{E} [\text{TV}(P, P')] \leq \mathbb{E} [P(\mathcal{F}^c \mid \mathcal{E})] + \mathbb{E} [P(\mathcal{E}^c)].$$

835 Since

$$P(\mathcal{F}^c \mid \mathcal{E}) = \Pr_P \left[ \exists t \in [0, T] : \|x_t\| \geq R \mid x_0 \in B(0, r) \right],$$

836 and by the law of total probability, we have

$$\mathbb{E} \left[ P(\mathcal{E}^c) \right] = \Pr_{x \sim p} (\|x\| \geq r) \leq \delta,$$

837 it follows that

$$\mathbb{E} \left[ \text{TV}(P, P') \right] \leq \mathbb{E} \left[ \Pr_P \left[ \exists t \in [0, T] : \|x_t\| \geq R \mid x_0 \in B(0, r) \right] \right] + \delta.$$

838 This completes the proof.  $\square$

839 Now we focus on bounding  $\mathbb{E}_{y_i, y_{i+1}} \left[ \Pr_P \left[ \exists t \in [0, T] : \|x_t\| \geq R \mid x_0 \in B(0, r) \right] \right]$ . We start by  
840 observing the following lemma for log-concave distributions.

841 **Lemma B.5.** *Let  $p$  be a log-concave distribution such that  $p$  is continuously differentiable. Suppose*  
842 *the mode of  $p$  is at 0. Then, for all  $x \in \mathbb{R}^d$ ,*

$$\langle \nabla \log p(x), x \rangle \leq 0.$$

843 *Proof.* Since  $\log p$  is concave, for any  $x, \theta \in \mathbb{R}^d$  the first-order condition for concavity yields

$$\log p(\theta) \leq \log p(x) + \langle \nabla \log p(x), -x \rangle.$$

844 Rearrange this inequality to obtain

$$\langle \nabla \log p(x), -x \rangle \geq \log p(\theta) - \log p(x).$$

845 Because  $\theta$  is a mode,  $\log p(\theta) \geq \log p(x)$  for every  $x \in \mathbb{R}^d$ ; hence,

$$\langle \nabla \log p(x), x \rangle \leq 0.$$

846  $\square$

847 **Lemma B.6.** *Let  $x_t$  be the stochastic process*

$$dx_t = (f(x_t) + g(x_t)) dt + \sqrt{2} dB_t, \quad x_0 \in \mathbb{R}^d,$$

848 *where  $B_t$  is a standard  $\mathbb{R}^d$ -valued Brownian motion and the functions  $f, g : \mathbb{R}^d \rightarrow \mathbb{R}^d$  satisfy*

$$\|f(x)\| \leq a \quad \text{and} \quad \langle g(x), x \rangle \leq 0 \quad \text{for all } x \in \mathbb{R}^d,$$

849 *with  $a \geq 0$ . Then, for any time horizon  $T > 0$  and  $\delta \in (0, 1)$ ,*

$$\Pr \left[ \sup_{t \in [0, T]} \|x_t\| \leq \|x_0\| + aT + 2\sqrt{T d \ln \left( \frac{2d}{\delta} \right)} \right] \geq 1 - \delta.$$

850 *Proof.* Define  $r(t) = \|x_t\|$ . Although the Euclidean norm is not smooth at the origin, an application  
851 of Itô's formula yields that, for  $x_t \neq 0$ , one has

$$dr(t) = \frac{\langle x_t, f(x_t) + g(x_t) \rangle}{\|x_t\|} dt + \sqrt{2} \langle u(t), dB_t \rangle + \frac{d-1}{\|x_t\|} dt,$$

852 where  $u(t) = x_t / \|x_t\|$ . Using the bound  $\|f(x_t)\| \leq a$  and the hypothesis  $\langle g(x_t), x_t \rangle \leq 0$ , it follows  
853 by the Cauchy–Schwarz inequality that

$$\frac{\langle x_t, f(x_t) \rangle}{\|x_t\|} \leq a \quad \text{and} \quad \frac{\langle x_t, g(x_t) \rangle}{\|x_t\|} \leq 0.$$

854 Discarding the nonnegative Itô correction term  $\frac{d-1}{\|x_t\|} dt$  (which can only increase the process), we  
855 deduce that

$$dr(t) \leq a dt + \sqrt{2} \langle u(t), dB_t \rangle.$$



856 Introduce the one-dimensional process

$$y(t) = \|x_0\| + at + \sqrt{2} \beta(t), \quad \text{with} \quad \beta(t) = \int_0^t \langle u(s), dB_s \rangle.$$

857 Since  $\|u(s)\| = 1$  for all  $s$ , the process  $\beta(t)$  is a standard one-dimensional Brownian motion with  
 858 quadratic variation  $\langle \beta \rangle_t = t$ . By a standard comparison theorem for one-dimensional stochastic  
 859 differential equations, it follows that  $r(t) \leq y(t)$  almost surely for all  $t \geq 0$ ; hence,

$$\sup_{t \in [0, T]} \|x_t\| \leq \|x_0\| + aT + \sqrt{2} \sup_{t \in [0, T]} \beta(t).$$

860 A classical application of the reflection principle for one-dimensional Brownian motion shows that,  
 861 for any  $\rho > 0$ ,

$$\Pr \left[ \sup_{t \in [0, T]} \beta(t) \geq \rho \right] = 2 \Pr(\beta(T) \geq \rho) \leq 2 \exp \left( -\frac{\rho^2}{2T} \right).$$

862 To incorporate the  $d$ -dimensional nature of the noise, one may use a union bound over the  $d$  coordi-  
 863 nate processes of  $B_t$ , which yields that

$$\Pr \left[ \sqrt{2} \sup_{t \in [0, T]} \beta(t) \leq 2\sqrt{T d \ln \left( \frac{2d}{\delta} \right)} \right] \geq 1 - \delta.$$

864 Combining the foregoing estimates, we deduce that

$$\Pr \left[ \sup_{t \in [0, T]} \|x_t\| \leq \|x_0\| + aT + 2\sqrt{T d \ln \left( \frac{2d}{\delta} \right)} \right] \geq 1 - \delta,$$

865 which is the desired result. □

866 **Lemma B.7.** For any  $\delta \in (0, 1)$  and  $T > 0$ , it holds that

$$\Pr_{x_t \sim P_t} \left[ \sup_{t \in [0, T]} \|x_t\| \geq r + T \cdot \frac{\|A^T y_{i+1}\|}{\eta_{i+1}^2} + 2\sqrt{T d \ln \left( \frac{2d}{\delta} \right)} \mid x_0 \in B(0, r) \right] < \delta.$$

867 *Proof.* We first note that by [Lemma B.5](#), for any  $x \in \mathbb{R}^d$ , we have

$$\left\langle s(x) - \frac{A^T A x}{\eta_{i+1}^2}, x \right\rangle \leq \langle s(x), x \rangle - \frac{1}{\eta_{i+1}^2} \|A x\|^2 \leq 0.$$

868 By [Lemma B.6](#), we have that

$$\Pr_{x_t \sim P} \left[ \sup_{t \in [0, T]} \|x_t\| \geq \|x_0\| + T \cdot \frac{\|A^T y_{i+1}\|}{\eta_{i+1}^2} + 2\sqrt{T d \ln \left( \frac{2d}{\delta} \right)} \right] < \delta,$$

869 This gives that

$$\Pr_{x_t \sim P_t} \left[ \sup_{t \in [0, T]} \|x_t\| \geq r + T \cdot \frac{\|A^T y_{i+1}\|}{\eta_{i+1}^2} + 2\sqrt{T d \ln \left( \frac{2d}{\delta} \right)} \mid x_0 \in B(0, r) \right] < \delta.$$

870 □

871 **Lemma B.8.** For any  $\delta \in (0, 1)$ , suppose

$$R \geq r + \frac{T \|A\|}{\eta_{i+1}^2} \left( \|A\| r + \eta_{i+1} (\sqrt{m} + \sqrt{2 \ln(1/\delta)}) \right) + 2\sqrt{dT \ln(2d/\delta)}.$$

872 It holds that

$$\mathbb{E}_{y_i, y_{i+1}} \left[ \Pr_{x_t \sim P} \left[ \sup_{t \in [0, T]} \|x_t\| \geq R \mid x_0 \in B(0, r) \right] \right] \lesssim \delta.$$

873 *Proof.* Recall that

$$y_{i+1} = Ax + \eta_{i+1}z, \quad z \sim \mathcal{N}(0, I_m).$$

874 With probability at least  $1 - \delta$

$$\|z\| \leq \sqrt{m} + \sqrt{2 \ln(1/\delta)}.$$

875 Since  $\|x\| \leq r$  with probability  $1 - \delta$ . Thus, with probability at least  $1 - 2\delta$ , it follows that

$$\|y_{i+1}\| \leq \|Ax\| + \eta_{i+1}\|z\| \leq \|A\|r + \eta_{i+1}(\sqrt{m} + \sqrt{2 \ln(1/\delta)}).$$

876 Hence, with the  $1 - 2\delta$  probability,

$$T \cdot \frac{\|A^T y_{i+1}\|}{\eta_{i+1}^2} \leq \frac{T\|A\|\|y_{i+1}\|}{\eta_{i+1}^2} \leq \frac{T\|A\|}{\eta_{i+1}^2} (\|A\|r + \eta_{i+1}(\sqrt{m} + \sqrt{2 \ln(1/\delta)})).$$

877 Therefore, ensuring that

$$R \geq r + T \cdot \frac{\|A^T y_{i+1}\|}{\eta_{i+1}^2} + 2\sqrt{T d \ln\left(\frac{2d}{\delta}\right)}.$$

878 In this case, [Lemma B.7](#) guarantees that

$$\Pr_{x_t \sim P} \left[ \sup_{t \in [0, T]} \|x_t\| \geq R \mid x_0 \in B(0, r) \right] \lesssim \delta.$$

879 Since the probability satisfying the condition is at least  $1 - 2\delta$ , we have

$$\mathbb{E}_{y_i, y_{i+1}} \left[ \Pr_{x_t \sim P} \left[ \sup_{t \in [0, T]} \|x_t\| \geq R \mid x_0 \in B(0, r) \right] \right] \lesssim \delta.$$

880

□

881 Putting [Lemma B.4](#) and [Lemma B.8](#) together, we directly obtain [Lemma B.3](#).

## 882 B.2 Concentration of Strongly Log-Concave Distributions

883 Before moving further, we first prove that a strongly log-concave distribution is highly concentrated.

884 **Lemma B.9** (Norm Bound for  $\alpha$ -Strongly Logconcave Distributions). *Let  $X$  be a random vector in*  
 885  $\mathbb{R}^d$  *with density*

$$\pi(x) \propto \exp(-V(x)),$$

886 *where the potential  $V : \mathbb{R}^d \rightarrow \mathbb{R}$  is  $\alpha$ -strongly convex; that is,*

$$\nabla^2 V(x) \succeq \alpha I \quad \text{for all } x \in \mathbb{R}^d.$$

887 *Denote by  $\mu = \mathbb{E}[X]$  the mean of  $X$ . Then, for any  $\delta \in (0, 1)$ , with probability at least  $1 - \delta$  we*  
 888 *have*

$$\|X - \mu\| \leq \sqrt{\frac{d}{\alpha}} + \sqrt{\frac{2 \ln(1/\delta)}{\alpha}}.$$

889 *Proof.* Since  $V$  is  $\alpha$ -strongly convex, the density  $\pi$  satisfies a logarithmic Sobolev inequality with  
 890 constant  $1/\alpha$ . Consequently, for any 1-Lipschitz function  $f : \mathbb{R}^d \rightarrow \mathbb{R}$  and any  $t > 0$ , one has the  
 891 concentration inequality (via Herbst's argument)

$$\mathbb{P}(f(X) - \mathbb{E}[f(X)] \geq t) \leq \exp\left(-\frac{\alpha t^2}{2}\right).$$

892 Noting that the function

$$f(x) = \|x - \mu\|$$

893 is 1-Lipschitz (by the triangle inequality), it follows that

$$\mathbb{P}(\|X - \mu\| - \mathbb{E}\|X - \mu\| \geq t) \leq \exp\left(-\frac{\alpha t^2}{2}\right).$$

894 A standard calculation using the fact that the covariance matrix of  $X$  satisfies  $\text{Cov}(X) \preceq \frac{1}{\alpha} I$  gives

$$\mathbb{E}\|X - \mu\| \leq \sqrt{\frac{d}{\alpha}}.$$

895 Thus, setting

$$t = \sqrt{\frac{2 \ln(1/\delta)}{\alpha}},$$

896 we obtain

$$\mathbb{P}\left(\|X - \mu\| \geq \sqrt{\frac{d}{\alpha}} + \sqrt{\frac{2 \ln(1/\delta)}{\alpha}}\right) \leq \delta.$$

897 This completes the proof.  $\square$

898 **Lemma B.10** ([JCP24]). *Let  $\mu$  and  $\theta$  denote the mean and the mode of distribution  $p$ , respectively, where  $p$  is  $\alpha$ -strongly log-concave and univariate. Then,  $|\mu - \theta| \leq \frac{1}{\sqrt{\alpha}}$ .*

900 This immediately gives us the following corollary.

901 **Corollary B.11.** *Let  $p$  be a  $\alpha$ -strongly log-concave distribution on  $\mathbb{R}^d$ . Let  $\theta$  be the mode of  $p$ . For every  $0 < \delta < 1$ , we have*

$$\Pr_{X \sim p} \left[ \|X - \theta\| \leq 2\sqrt{\frac{d}{\alpha}} + \sqrt{\frac{2 \log(1/\delta)}{\alpha}} \right] \geq 1 - \delta.$$

903 This also implies that every  $\alpha$ -strongly log-concave distribution is mode-centered locally well-conditioned.

905 **Lemma B.12.** *Let  $p$  be an  $\alpha$ -strongly log-concave distribution. Suppose the score function of  $p$  is  $L$ -Lipschitz. Then, for any  $0 < \delta < 1$ , we have that  $p$  is  $(\delta, 2\sqrt{\frac{d}{\alpha}} + \sqrt{\frac{2 \log(1/\delta)}{\alpha}}, \infty, L/\alpha, \alpha)$  mode-centered locally well-conditioned.*

### 908 B.3 Convergence to Target Distribution

909 Since  $p$  is not globally strongly log-concave, we need to extend the distribution  $p$  to a globally strongly log-concave distribution. We will use the following lemma to extend the distribution.

911 **Lemma B.13.** *Suppose  $g : B(0, R) \rightarrow \mathbb{R}$  is continuously differentiable with gradient  $s := \nabla g \in C(B(0, R); \mathbb{R}^d)$  and satisfies*

$$\langle s(y) - s(x), x - y \rangle \geq \alpha \|x - y\|^2, \quad \forall x, y \in B(0, R). \quad (7)$$

913 For every  $z \in B(0, R)$  define

$$\varphi_z(x) = g(z) + \langle s(z), x - z \rangle - \frac{\alpha}{2} \|x - z\|^2, \quad x \in \mathbb{R}^d,$$

914 and set

$$\tilde{g}(x) = \begin{cases} g(x), & \|x\| \leq R, \\ \inf_{z \in B(0, R)} \varphi_z(x), & \|x\| > R. \end{cases} \quad (8)$$

915 Then the density  $\tilde{p}(x) \propto e^{\tilde{g}(x)}$  is globally  $\alpha$ -strongly log-concave.

916 *Proof.* For each fixed  $z \in B(0, R)$  the mapping  $\varphi_z$  has Hessian  $-\alpha I_d$ , hence is  $\alpha$ -strongly concave on the whole space. Because of (7) we have

$$g(x) \leq g(z) + \langle s(z), x - z \rangle - \frac{\alpha}{2} \|x - z\|^2 = \varphi_z(x), \quad \forall x, z \in B(0, R),$$

918 with equality when  $x = z$ . Consequently  $\tilde{g}$  defined in (8) agrees with  $g$  on  $B(0, R)$ .

919 Fix  $x \in \mathbb{R}^d$  and choose  $z_x \in B(0, R)$  attaining the infimum in (8). Because  $\varphi_{z_x}$  touches  $\tilde{g}$  from above at  $x$ , the vector

$$\xi = \nabla \varphi_{z_x}(x) = s(z_x) - \alpha(x - z_x)$$

921 belongs to  $\partial \tilde{g}(x)$ . By  $\alpha$ -strong concavity of  $\varphi_{z_x}$ ,

$$\varphi_{z_x}(y) \leq \varphi_{z_x}(x) + \langle \xi, y - x \rangle - \frac{\alpha}{2} \|y - x\|^2, \quad \forall y \in \mathbb{R}^d.$$

922 Taking the infimum over  $z$  on the left and using  $\tilde{g}(x) = \varphi_{z_x}(x)$  gives that

$$\tilde{g}(y) \leq \tilde{g}(x) + \langle \xi, y - x \rangle - \frac{\alpha}{2} \|y - x\|^2, \quad \forall x, y \in \mathbb{R}^d;$$

923 hence  $\tilde{g}$  is globally  $\alpha$ -strongly concave, and therefore  $\tilde{p}$  is  $\alpha$ -strongly log-concave.  $\square$

924 **Lemma B.14.** *Let  $p$  be a  $d$ -dimensional  $(\delta, r, R, \tilde{L}, \alpha)$  mode-centered locally well-conditioned prob-*  
 925 *ability distribution with  $0 < \delta \leq 1/2$  and  $\alpha > 0$ . Assume*

$$R \geq 2\sqrt{\frac{d}{\alpha}} + \sqrt{\frac{2\log(1/\delta)}{\alpha}}.$$

926 *Then there exists an  $\alpha$ -strongly log-concave distribution  $\tilde{p}$  on  $\mathbb{R}^d$  such that*

$$\text{TV}(p, \tilde{p}) \leq 3\delta.$$

927 *Proof.* Let  $\theta$  be the point in Definition B.1 and without loss of generality, we assume  $\theta = 0$ . Write  
 928  $B := B(0, R)$  and  $B^c := \mathbb{R}^d \setminus B$ . By definition  $p(B^c) \leq \delta$ .

929 Set  $g := \log p$ , and let  $\tilde{g}$  be the function in Lemma B.13. Then,  $\rho(x) := e^{\tilde{g}(x)}$  is  $\alpha$ -strongly log-  
 930 concave and  $\rho = p$  on  $B$ . Let  $Z := \int_{\mathbb{R}^d} \rho$  and define  $\tilde{p} := \rho/Z$ .

931 Now we bound

$$\text{TV}(p, \tilde{p}) = \frac{1}{2} \int_B |p - \tilde{p}| + \frac{1}{2} \int_{B^c} |p - \tilde{p}| =: I_B + I_{B^c}.$$

932 Corollary B.11 implies that  $\tilde{p}(B^c) \leq \delta$ . Therefore,

$$I_{B^c} \leq \frac{1}{2} [p(B^c) + \tilde{p}(B^c)] \leq \delta.$$

933 Note that  $\int_B \rho = p(B) \geq 1 - \delta$  and  $\int_{B^c} \rho \leq \delta Z$  (since  $\tilde{p}(B^c) \leq \delta$ ). Thus,

$$1 - \delta \leq Z = p(B) + \int_{B^c} \rho \leq 1 + 2\delta.$$

934 Since  $\tilde{p} = p/Z$  on  $B$ , we have

$$\left| 1 - \frac{1}{Z} \right| \leq \left| \frac{Z - 1}{1 - \delta} \right| \leq \frac{2\delta}{1 - \delta} \leq 4\delta.$$

935 Therefore,  $I_B \leq \frac{1}{2} \cdot 4\delta = 2\delta$ .

936 Combining,

$$\text{TV}(p, \tilde{p}) \leq 2\delta + \delta = 3\delta.$$

937  $\square$

938 Now, we can consider process  $\tilde{P}$  defined as

$$dx_t = \left( \nabla \log \tilde{p}(x_t) + \frac{A^T y_{i+1} - A^T A x_t}{\eta_{i+1}^2} \right) dt + \sqrt{2} dB_t, \quad x_0 \sim p(x \mid y_i).$$

939 Then, we have the following lemma.

940 **Lemma B.15.** *Suppose the following holds:*

$$R \geq r + \frac{T\|A\|}{\eta_{i+1}^2} \left( \|A\|r + \eta_{i+1}(\sqrt{m} + \sqrt{2\ln(1/\delta)}) \right) + 2\sqrt{dT\ln(2d/\delta)}.$$

941 *We have that*

$$\mathbb{E} [\text{TV}(P, \tilde{P})] \lesssim \delta.$$

942 *Proof.* Let

$$\mathcal{E} = \left\{ \sup_{t \in [0, T]} \|x_t\| \leq R \right\} \quad \text{and} \quad P' = P(\cdot \mid \mathcal{E}), \tilde{P}' = \tilde{P}(\cdot \mid \mathcal{E}).$$

943 Because  $s(x) = \nabla \log \tilde{p}(x)$  for every  $x \in B(0, R)$ , the drift coefficients of  $P$  and  $\tilde{P}$  coincide on the  
 944 event  $\mathcal{E}$ , and hence conditioning on  $\mathcal{E}$  gives  $P' = \tilde{P}'$ .

945 Then, we have

$$\text{TV}(P, \tilde{P}) \leq \text{TV}(P, P') + \text{TV}(\tilde{P}, \tilde{P}') = P(\mathcal{E}^c) + \tilde{P}(\mathcal{E}^c).$$

946 Taking expectation over  $(y_i, y_{i+1})$  gives

$$\mathbb{E}[\text{TV}(P, \tilde{P})] \leq \mathbb{E}[P(\mathcal{E}^c)] + \mathbb{E}[\tilde{P}(\mathcal{E}^c)]. \quad (9)$$

947 Lemma B.3 implies that  $\mathbb{E}[P(\mathcal{E}^c)] \lesssim \delta$ . Furthermore, the same argument also implies that  
 948  $\mathbb{E}[\tilde{P}(\mathcal{E}^c)] \lesssim \delta$ . Therefore, we have

$$\mathbb{E}[\text{TV}(P, \tilde{P})] \lesssim \delta.$$

949 □

950 *Proof of Lemma B.2.* We start by considering another process  $\tilde{P}^s$  defined as

$$dx_t = \left( \nabla \log \tilde{p}(x_t) + \frac{A^T y_{i+1} - A^T A x_t}{\eta_{i+1}^2} \right) dt + \sqrt{2} dB_t, \quad x_0 \sim \tilde{p}(x \mid y_i).$$

951 We can see that

$$\mathbb{E}[\text{TV}(\tilde{P}, \tilde{P}^s)] \leq \mathbb{E}[\text{TV}(p(x \mid y_i), \tilde{p}(x \mid y_i))] \lesssim \delta.$$

952 Combining this with Lemma B.15, we have that

$$\mathbb{E}[\text{TV}(P, \tilde{P}^s)] \lesssim \delta.$$

953 By Markov's inequality, we have that

$$\Pr_{y_i, y_{i+1}} [\text{TV}(P, \tilde{P}^s) \geq \lambda \delta] \leq O(\lambda^{-1}).$$

954 Furthermore, by Lemma A.1 and our constraint on  $T$ , we have that

$$\Pr_{y_i, y_{i+1}} [\text{TV}(\tilde{P}_T^s, \tilde{p}(x \mid y_{i+1})) \leq \varepsilon] \geq 1 - O(\lambda^{-1}).$$

955 Therefore, we have that

$$\Pr_{y_i, y_{i+1}} [\text{TV}(P_T, \tilde{p}(x \mid y_{i+1})) \leq \varepsilon + \lambda \delta] \geq 1 - O(\lambda^{-1}).$$

956 Combining this with  $\Pr[\text{TV}(\tilde{p}(x \mid y_{i+1}), p(x \mid y_{i+1})) \leq \lambda \delta] \geq 1 - O(\lambda^{-1})$ , we conclude that for  
 957  $x_T \sim P_T$ ,

$$\Pr_{y_i, y_{i+1}} [\text{TV}(x_T, p(x \mid y_{i+1})) \leq \varepsilon + \lambda \delta] \geq 1 - O(\lambda^{-1}).$$

958 □

## 959 C Control of Score Approximation and Discretization Errors

960 In this section, we consider these processes running for time  $T$ :

961 • Process  $P$ :

$$dx_t = \left( s(x_t) + \frac{A^T y_{i+1} - A^T A x_t}{\eta_{i+1}^2} \right) dt + \sqrt{2} dB_t, \quad x_0 \sim p(x \mid y_i)$$

962 • Process  $\hat{P}$ : Let  $0 = t_1 < \dots < t_M = T$  be the  $M$  discretization steps with step size  
 963  $t_{j+1} - t_j = h$ . For  $t \in [t_j, t_{j+1}]$ ,

$$dx_t = \left( \hat{s}(x_{t_j}) + \frac{A^T y_{i+1} - A^T A x_{t_j}}{\eta_{i+1}^2} \right) dt + \sqrt{2} dB_t, \quad x_0 \sim p(x \mid y_i)$$

964 Note that  $\hat{P}$  is exactly the process (2) we run in Algorithm 1, except that we start from  $x_0 \sim p(x \mid$   
 965  $y_i)$ .

966 We have shown that the process  $P$  will converge to the target distribution  $p(x \mid y_{i+1})$ . We will show  
 967 that the process  $\hat{P}$  will also converge to  $p(x \mid y_{i+1})$  with a small error

968 **Lemma C.1.** *Let  $p$  be a  $(\delta, r, R, \tilde{L}, \alpha)$  mode-centered locally well-conditioned. Suppose the follow-*  
 969 *ings hold for a large enough constant  $C > 0$ :*

- 970 •  $T > C \left( \frac{m\gamma_i + \log(\lambda/\varepsilon)}{\alpha} \right).$
- 971 •  $\|A\|^4(T^2m + TR^2) \leq \frac{\eta_i^4}{C\gamma_i^2}.$
- 972 •  $R \geq r + \frac{T\|A\|}{\eta_{i+1}^2} \left( \|A\|r + \eta_{i+1}(\sqrt{m} + \sqrt{2\ln(1/\delta)}) \right) + 2\sqrt{dT\ln(2d/\delta)}.$

973 Then running  $\hat{P}$  for time  $T$  guarantees that with probability at least  $1 - 1/\lambda$  over  $y_i$  and  $y_{i+1}$ , we  
 974 have:

$$\text{TV}(\hat{P}_T, p(x \mid y_{i+1})) \lesssim \varepsilon + \lambda\delta + \lambda\sqrt{T} \cdot \left( \left( \tilde{L}\alpha + \frac{\|A\|^2}{\eta_i^2} \right) \left( h\tilde{L}\alpha R + \frac{h\|A\|^2 R + h\|A\|\sqrt{m}\eta_i}{\eta_i^2} + \sqrt{dh} \right) + \varepsilon_{\text{score}} \right).$$

975 In this section, we assume  $p$  is  $(\delta, r, R, \tilde{L}, \alpha)$  mode-centered locally well-conditioned. Without loss  
 976 of generality, we assume that the mode of  $p$  is at 0, i.e.,  $\theta = 0$ . Let  $L := \tilde{L}\alpha$ , i.e., the Lipschitz  
 977 constant inside the ball  $B(0, R)$ .

978 We will also consider the following stochastic processes:

- 979 • Process  $Q$ :

$$dx_t = \left( s(x_t) + \frac{A^T y_i - A^T A x_t}{\eta_i^2} \right) dt + \sqrt{2} dB_t, \quad x_0 \sim p(x \mid y_i)$$

- 980 • Process  $Q'$  is the process  $Q$  conditioned on  $x_t \in B(0, R)$  for  $t \in [0, T]$ .

- 981 • Process  $P'$  is the process  $P$  conditioned on  $x_t \in B(0, R)$  for  $t \in [0, T]$ .

982 We first note that following the same proof in Lemma B.3 that bounds  $\text{TV}(P, P')$ , we can also  
 983 bound  $\text{TV}(Q, Q')$ .

984 **Lemma C.2.** *Suppose the following holds:*

$$R \geq r + \frac{T\|A\|}{\eta_i^2} \left( \|A\|r + \eta_i(\sqrt{m} + \sqrt{2\ln(1/\delta)}) \right) + 2\sqrt{dT\ln(2d/\delta)}.$$

985 We have that

$$\mathbb{E}[\text{TV}(Q, Q')] \lesssim \delta.$$

986 **Lemma C.3.** *We have*

$$\mathbb{E}_{x_t \sim Q'} [\|x_t - x_{t_j}\|^4] \lesssim \left( hLR + \frac{h\|A\|\|y_i\| + h\|A\|^2 R}{\eta_i^2} \right)^4 + d^2 h^2$$

*Proof.*

$$\begin{aligned} & \mathbb{E}_{x_t \sim Q'} [\|x_t - x_{t_j}\|^4] \\ &= \mathbb{E}_{x_t \sim Q'} \left[ \left\| \int_{t_j}^t \left( s(x_s) + \frac{A^T y_i - A^T A x_s}{\eta_i^2} \right) ds + \sqrt{2} dB_s \right\|^4 \right] \\ &\lesssim \mathbb{E}_{x_t \sim Q'} \left[ \left( \int_{t_j}^t \|s(x_s)\| ds \right)^4 \right] + \mathbb{E}_{x_t \sim Q'} \left[ \left( \int_{t_j}^t \left\| \frac{A^T y_i - A^T A x_s}{\eta_i^2} \right\| ds \right)^4 \right] + \mathbb{E}_{x_t \sim Q'} \left[ \left\| \int_{t_j}^t \sqrt{2} dB_s \right\|^4 \right] \\ &\lesssim (hLR)^4 + \left( \frac{h\|A\|\|y_i\|}{\eta_i^2} \right)^4 + \left( \frac{h\|A\|^2 R}{\eta_i^2} \right)^4 + \mathbb{E} \left[ \left\| \int_{t_j}^t \sqrt{2} dB_s \right\|^4 \right]. \end{aligned}$$

987 Since  $\int_{t_j}^t \sqrt{2} dB_s \sim \mathcal{N}(0, (t - t_j)I_d)$ , we have that  $\mathbb{E} \|\int_{t_j}^t \sqrt{2} dB_s\|^4 \lesssim d^2(t - t_j)^2 \lesssim d^2 h^2$ . This  
 988 gives that

$$\mathbb{E}_{x_t \sim Q'} [\|x_t - x_{t_j}\|^4] \lesssim \left( hLR + \frac{h \|A\| \|y_i\| + h \|A\|^2 R}{\eta_i^2} \right)^4 + d^2 h^2$$

989

□

990 **Lemma C.4.** Suppose  $\|A\|^4(T^2 m + TR^2) \leq \frac{\eta_i^4 \eta_{i+1}^4}{C(\eta_i^2 - \eta_{i+1}^2)^2}$  for a large enough constant  $C$ .

$$\mathbb{E}_{y_i, y_{i+1}, x_t \sim Q'} \left[ \left( \frac{dP'}{dQ'}(x_t) \right)^2 \right] = O(1).$$

991 *Proof.* By Girsanov's theorem, for any trajectory  $x_0, \dots, t$ ,

$$\frac{dP'}{dQ'}(x_0, \dots, t) = \exp(M_t)$$

992 where the Girsanov exponent  $M_t$  is given by

$$M_t = \frac{1}{\sqrt{2}} \int_0^t \Delta b_y(x_u) \cdot dB_u - \frac{1}{4} \int_0^t \|\Delta b_y(x_u)\|^2 du$$

993 for

$$\begin{aligned} \Delta b_y(x_u) &= \frac{A^T y_{i+1} - A^T A x_u}{\eta_{i+1}^2} - \frac{A^T y_i - A^T A x_u}{\eta_i^2} \\ &= \frac{\eta_i^2 A^T y_{i+1} - \eta_{i+1}^2 A^T y_i - A^T A x_u (\eta_i^2 - \eta_{i+1}^2)}{\eta_{i+1}^2 \eta_i^2}. \end{aligned}$$

994 Since  $Q'$  is supported in  $B(0, R)$ ,

$$\|\Delta b_y(x_u)\| \leq O \left( \frac{\|A\| \|\eta_i^2 y_{i+1} - \eta_{i+1}^2 y_i\| + \|A\|^2 (\eta_i^2 - \eta_{i+1}^2) R}{\eta_{i+1}^2 \eta_i^2} \right) := \kappa_y$$

995 Now, for  $\zeta_y := \int_0^t \|\Delta b_y(x_u)\|^2 du$ , we have that  $M_t \sim \mathcal{N}(-\frac{1}{4}\zeta_y, \frac{1}{2}\zeta_y)$

996 So,

$$\mathbb{E}[\exp(2M_t)] \leq \exp(\zeta_y/2) \leq \exp(\kappa_y^2 t/2)$$

997 Note that  $\|\eta_i^2 y_{i+1} - \eta_{i+1}^2 y_i\|^2$  has mean  $\|(\eta_i^2 - \eta_{i+1}^2)Ax\|^2$  and is subgamma with variance

998  $m(\eta_{i+1}^2 \eta_i^4 - \eta_{i+1}^4 \eta_i^2)^2$  and scale  $\eta_{i+1}^2 \eta_i^4 - \eta_{i+1}^4 \eta_i^2$ . Thus, for  $t\|A\|^2 \leq \frac{\eta_{i+1}^2 \eta_i^2}{C(\eta_i^2 - \eta_{i+1}^2)}$  we have

$$\begin{aligned} \mathbb{E}_{x, y_{i+1}, y_i} [\exp(2M_t)] &\leq \mathbb{E} \left[ \exp \left( t \frac{\|A\|^2 \|\eta_i^2 y_{i+1} - \eta_{i+1}^2 y_i\|^2 + (\eta_i^2 - \eta_{i+1}^2)^2 \|A\|^4 R^2}{\eta_{i+1}^4 \eta_i^4} \right) \right] \\ &\lesssim \exp \left( 2 \left( \frac{t^2 \|A\|^4 (\eta_{i+1}^2 \eta_i^4 - \eta_{i+1}^4 \eta_i^2)^2 m}{\eta_{i+1}^8 \eta_i^8} + \frac{(\eta_i^2 - \eta_{i+1}^2)^2 \|A\|^4 t R^2}{\eta_{i+1}^4 \eta_i^4} \right) \right) \\ &= \exp \left( 2 \left( \frac{t^2 \|A\|^4 (\eta_i^2 - \eta_{i+1}^2)^2 m + (\eta_i^2 - \eta_{i+1}^2)^2 \|A\|^4 t R^2}{\eta_{i+1}^4 \eta_i^4} \right) \right) \\ &= \exp \left( \frac{\|A\|^4 (\eta_i^2 - \eta_{i+1}^2)^2 \cdot (t^2 m + t R^2)}{\eta_{i+1}^4 \eta_i^4} \right) \\ &\lesssim 1. \end{aligned}$$

999

□

1000 **Lemma C.5.** Let  $E$  be the event on  $y_i$  such that  $\text{TV}(Q, Q') \leq \frac{1}{2}$ . Suppose

$$\|A\|^4(T^2m + TR^2) \leq \frac{\eta_i^4\eta_{i+1}^4}{C(\eta_i^2 - \eta_{i+1}^2)^2}.$$

1001 Then,

$$\mathbb{E}_{y_i, y_{i+1}} [\text{TV}(P', \hat{P})] \lesssim 1 - \Pr[E] + \sqrt{T} \cdot \left( \left( L + \frac{A^T A}{\eta_i^2} \right) \left( hLR + \frac{h\|A\|^2 R + h\|A\|\sqrt{m}\eta_i}{\eta_i^2} + \sqrt{dh} \right) + \varepsilon_{score} \right).$$

1002 *Proof.* Note that the bound is trivial when  $\Pr[E] < 1/2$ . Therefore, we can use the fact that

1003  $\mathbb{E}[\cdot | E] \lesssim \mathbb{E}[\cdot]$  throughout the proof. We have, for any  $t \in [t_j, t_{j+1}]$ ,

$$\begin{aligned} & \mathbb{E}_{y_i, y_{i+1} | E} \mathbb{E}_{x_t \sim P'} \left[ \|s(x_t) - \hat{s}(x_{t_j})\|^2 + \left\| \frac{A^T A}{\eta_i^2} (x_t - x_{t_j}) \right\|^2 \right] \\ &= \mathbb{E}_{y_i, y_{i+1} | E} \mathbb{E}_{x_t \sim Q'} \left[ \frac{dP'}{dQ'} \cdot \left( \|s(x_t) - \hat{s}(x_{t_j})\|^2 + \left\| \frac{A^T A}{\eta_i^2} (x_t - x_{t_j}) \right\|^2 \right) \right] \\ &\lesssim \sqrt{\mathbb{E}_{y_i, y_{i+1}, x_t \sim Q'} \left[ \left( \frac{dP'}{dQ'} (x_t) \right)^2 \right] \cdot \mathbb{E}_{y_i | E} \mathbb{E}_{x_t \sim Q'} \left[ \|s(x_t) - \hat{s}(x_{t_j})\|^4 + \left\| \frac{A^T A}{\eta_i^2} (x_t - x_{t_j}) \right\|^4 \right]} \end{aligned}$$

1004 The first term can be bounded using Lemma C.4. Now we focus on the second term. Note that

$$\mathbb{E}_{y_i | E} \left[ \mathbb{E}_{x_t \sim Q'} [\|s(x_t) - \hat{s}(x_{t_j})\|^4] \right] \leq \mathbb{E}_{y_i | E} \left[ \mathbb{E}_{x_t \sim Q'} [\|s(x_t) - s(x_{t_j})\|^4] \right] + \mathbb{E}_{y_i | E} \left[ \mathbb{E}_{x_t \sim Q'} [\|s(x_{t_j}) - \hat{s}(x_{t_j})\|^4] \right].$$

1005 Since  $s$  is  $L$ -Lipschitz in  $B(0, R)$ , and using Lemma C.3, we have

$$\begin{aligned} & \mathbb{E}_{y_i | E} \left[ \mathbb{E}_{x_t \sim Q'} \left[ \|s(x_t) - s(x_{t_j})\|^4 + \left\| \frac{A^T A}{\eta_i^2} (x_t - x_{t_j}) \right\|^4 \right] \right] \\ &\lesssim \mathbb{E}_{y_i} \left[ \left( L + \frac{A^T A}{\eta_i^2} \right)^4 \mathbb{E}_{x_t \sim Q'} [\|x_t - x_{t_j}\|^4] \right] \\ &\lesssim \left( L + \frac{A^T A}{\eta_i^2} \right)^4 \mathbb{E}_{y_i} \left[ \left( hLR + \frac{h\|A\| y_i + h\|A\|^2 R}{\eta_i^2} \right)^4 + d^2 h^2 \right] \\ &\lesssim \left( L + \frac{A^T A}{\eta_i^2} \right)^4 \left( hLR + \frac{h\|A\|^2 R + h\|A\|\sqrt{m}\eta_i}{\eta_i^2} + \sqrt{dh} \right)^4. \end{aligned}$$

1006 Since  $Q'$  is a conditional measure of  $Q$ , conditioned on  $E$ , we have  $\frac{dQ'}{dQ} \leq \frac{1}{1 - \text{TV}(Q', Q)} \leq 2$ .

1007 Therefore,

$$\begin{aligned} \mathbb{E}_{y_i | E} \left[ \mathbb{E}_{x_t \sim Q'} [\|s(x_{t_j}) - \hat{s}(x_{t_j})\|^4] \right] &\leq \mathbb{E}_{y_i | E} \left[ 2 \cdot \mathbb{E}_{x_t \sim Q} [\|s(x_{t_j}) - \hat{s}(x_{t_j})\|^4] \right] \\ &\lesssim \mathbb{E}_{y_i} \left[ \mathbb{E}_{x_t \sim Q} [\|s(x_{t_j}) - \hat{s}(x_{t_j})\|^4] \right] \\ &\leq \varepsilon_{score}^4 \end{aligned}$$

1008 This gives that

$$\begin{aligned} & \mathbb{E}_{y_i, y_{i+1} | E} \mathbb{E}_{x_t \sim P'} \left[ \|s(x_t) - \hat{s}(x_{t_j})\|^2 + \left\| \frac{A^T A}{\eta_i^2} (x_t - x_{t_j}) \right\|^2 \right] \\ &\lesssim \left( L + \frac{A^T A}{\eta_i^2} \right)^2 \left( hLR + \frac{h\|A\|^2 R + h\|A\|\sqrt{m}\eta_i}{\eta_i^2} + \sqrt{dh} \right)^2 + \varepsilon_{score}^2. \end{aligned}$$



1009 Thus, by Girsanov's theorem,

$$\begin{aligned} \mathbb{E}_{y_i, y_{i+1} | E} \left[ \text{KL} \left( P' \parallel \hat{P} \right) \right] &\lesssim \sum_{j=0}^{M-1} \int_{t_j}^{t_{j+1}} \mathbb{E}_{y_i, y_{i+1}, x_t \sim P'} \left[ \|s(x_t) - \hat{s}(x_{t_j})\|^2 + \left\| \frac{A^T A}{\eta_i^2} (x_t - x_{t_j}) \right\|^2 \right] \\ &\lesssim T \cdot \left( \left( L + \frac{\|A\|^2}{\eta_i^2} \right)^2 \left( hLR + \frac{h\|A\|^2 R + h\|A\|\sqrt{m}\eta_i}{\eta_i^2} + \sqrt{dh} \right)^2 + \varepsilon_{score}^2 \right). \end{aligned}$$

1010 By Pinsker's inequality,

$$\mathbb{E}_{y_i, y_{i+1} | E} \left[ \text{TV}(P', \hat{P}) \right] \lesssim \sqrt{T} \cdot \left( \left( L + \frac{\|A\|^2}{\eta_i^2} \right) \left( hLR + \frac{h\|A\|^2 R + h\|A\|\sqrt{m}\eta_i}{\eta_i^2} + \sqrt{dh} \right) + \varepsilon_{score} \right)$$

1011 Hence,

$$\begin{aligned} \mathbb{E}_{y_i, y_{i+1}} \left[ \text{TV}(P', \hat{P}) \right] &\leq 1 - \Pr[E] + \mathbb{E}_{y_i, y_{i+1} | E} \left[ \text{TV}(P', \hat{P}) \right] \\ &\lesssim 1 - \Pr[E] + \sqrt{T} \cdot \left( \left( L + \frac{\|A\|^2}{\eta_i^2} \right) \left( hLR + \frac{h\|A\|^2 R + h\|A\|\sqrt{m}\eta_i}{\eta_i^2} + \sqrt{dh} \right) + \varepsilon_{score} \right). \end{aligned}$$

1012  $\square$

1013 Then have the following as a corollary:

1014 **Corollary C.6.** *Suppose*

$$\|A\|^4 (T^2 m + TR^2) \leq \frac{\eta_i^4 \eta_{i+1}^4}{C(\eta_i^2 - \eta_{i+1}^2)^2}.$$

1015 *Then,*

$$\begin{aligned} \mathbb{E}_{y_i, y_{i+1}} \left[ \text{TV}(P, \hat{P}) \right] &\lesssim \mathbb{E} [\text{TV}(P, P')] + \mathbb{E} [\text{TV}(Q, Q')] \\ &\quad + \sqrt{T} \cdot \left( \left( L + \frac{\|A\|^2}{\eta_i^2} \right) \left( hLR + \frac{h\|A\|^2 R + h\|A\|\sqrt{m}\eta_i}{\eta_i^2} + \sqrt{dh} \right) + \varepsilon_{score} \right). \end{aligned}$$

1016 *Proof.* We have that

$$\mathbb{E}_{y_i, y_{i+1}} \left[ \text{TV}(P, \hat{P}) \right] \leq \mathbb{E}_{y_i, y_{i+1}} [\text{TV}(P, P')] + \mathbb{E}_{y_i, y_{i+1}} [\text{TV}(P', \hat{P})].$$

1017 Furthermore,

$$\begin{aligned} &\mathbb{E}_{y_i, y_{i+1}} [\text{TV}(P', \hat{P})] \\ &\lesssim \Pr \left[ \text{TV}(Q, Q') > \frac{1}{2} \right] + \sqrt{T} \cdot \left( \left( L + \frac{\|A\|^2}{\eta_i^2} \right) \left( hLR + \frac{h\|A\|^2 R + h\|A\|\sqrt{m}\eta_i}{\eta_i^2} + \sqrt{dh} \right) + \varepsilon_{score} \right) \\ &\lesssim \mathbb{E} [\text{TV}(Q, Q')] + \sqrt{T} \cdot \left( \left( L + \frac{\|A\|^2}{\eta_i^2} \right) \left( hLR + \frac{h\|A\|^2 R + h\|A\|\sqrt{m}\eta_i}{\eta_i^2} + \sqrt{dh} \right) + \varepsilon_{score} \right), \end{aligned}$$

1018 where the last line follows from Markov's inequality. The gives the result.  $\square$

1019 *Proof of Lemma C.1.* We note that by our definition of  $\gamma_i$ ,

$$\|A\|^4 (T^2 m + TR^2) \leq \frac{\eta_i^4 \eta_{i+1}^4}{C(\eta_i^2 - \eta_{i+1}^2)^2} \iff \|A\|^4 (T^2 m + TR^2) \leq \frac{\eta_i^4}{C\gamma_i^2}$$

1020 Then, combining Corollary C.6 with Lemmas B.3 and C.2, we have

$$\begin{aligned} \mathbb{E}_{y_i, y_{i+1}} [\text{TV}(P, \hat{P})] &\lesssim \mathbb{E} [\text{TV}(P, P')] + \mathbb{E} [\text{TV}(Q, Q')] \\ &\quad + \sqrt{T} \cdot \left( \left( L + \frac{\|A\|^2}{\eta_i^2} \right) \left( hLR + \frac{h\|A\|^2 R + h\|A\|\sqrt{m}\eta_i}{\eta_i^2} + \sqrt{dh} \right) + \varepsilon_{\text{score}} \right) \\ &\lesssim \delta + \sqrt{T} \cdot \left( \left( L + \frac{\|A\|^2}{\eta_i^2} \right) \left( hLR + \frac{h\|A\|^2 R + h\|A\|\sqrt{m}\eta_i}{\eta_i^2} + \sqrt{dh} \right) + \varepsilon_{\text{score}} \right) \end{aligned}$$

1021 The conditions in Lemmas B.3 and C.2 are satisfied by our assumptions, noting that  $\eta_{i+1} < \eta_i$   
 1022 implies the bound on  $R$  holds for both processes.

1023 Applying Markov's inequality and combining Lemma B.2 with the above, we conclude the proof.  
 1024  $\square$

## 1025 D Admissible Noise Schedule

1026 Recall that we can define process  $\hat{P}_i$  that converges from  $p(x \mid y_i)$  to  $p(x \mid y_{i+1})$ : Let  $0 = t_1 <$   
 1027  $\dots < t_M = T$  be the  $M$  discretization steps with step size  $t_{j+1} - t_j = h$ . For  $t \in [t_j, t_{j+1}]$ ,

$$dx_t = \left( \hat{s}(x_{t_j}) + \frac{A^T y_{i+1} - A^T A x_{t_j}}{\eta_{i+1}^2} \right) dt + \sqrt{2} dB_t, \quad x_0 \sim p(x \mid y_i) \quad (10)$$

1028 We have already proven that we can converge the process from  $p(x \mid y_i)$  to  $p(x \mid y_{i+1})$  with good  
 1029 probability, as long as some conditions are satisfied. Those conditions actually depend on the choice  
 1030 of the schedule of  $\eta_i$  and  $T_i$ . In this section, we will specify the schedule of  $\eta_i$  and  $T_i$ .

1031 Now we specify the schedule of  $\eta_i$  and  $T_i$ .

1032 **Definition D.1.** We say a noise schedule  $\eta_1 > \dots > \eta_N$  together with running times  $T_1, \dots, T_{N-1}$   
 1033 is admissible (for a set of parameters  $C, \alpha, \lambda, A, d, \varepsilon, \eta, R$ ) if:

- 1034 •  $\eta_N = \eta$ ;
- 1035 •  $\eta_1 \geq \frac{\lambda\|A\|}{\varepsilon} \sqrt{\frac{d}{\alpha}}$ ;
- 1036 • For all  $\gamma_i = (\eta_i/\eta_{i+1})^2 - 1$ , we have  $\gamma_i \leq 1$  and

$$T_i \geq C \left( \frac{m\gamma_i + \log(\lambda/\varepsilon)}{\alpha} \right).$$

1037 Furthermore,

$$\|A\|^4 (T_i^2 m + T_i R^2) \leq \frac{\eta_i^4}{C\gamma_i^2}.$$

1038 The reason we need to satisfy the last inequality is to satisfy the conditions in Lemma C.1. We  
 1039 formalize this in the following lemma.

1040 **Lemma D.2.** Let  $C > 0$  be a sufficiently large constant and  $p$  be a  $(\delta, r, R, \tilde{L}, \alpha)$  mode-centered  
 1041 locally well-conditioned distribution. For any  $\delta, \varepsilon \in (0, 1)$  and  $\lambda > 1$ , suppose

$$R \geq r + C \left( \frac{(m + \log \frac{\lambda}{\varepsilon})\|A\|}{\alpha\eta^2} \left( \|A\| r + \eta \sqrt{m + \log(1/\delta)} \right) + \sqrt{\frac{d \log(d/\delta)(m + \log(\lambda/\varepsilon))}{\alpha}} \right).$$

1042 For any admissible schedule  $(\eta_i)_{i \in [N]}$  and  $(T_i)_{i \in [N-1]}$ , running the process  $\hat{P}_i$  for time  $T_i$  guaran-  
 1043 tees that with probability at least  $1 - 1/\lambda$  over  $y_i$  and  $y_{i+1}$ :

$$\text{TV}(x_{T_i}, p(x \mid y_{i+1})) \lesssim \varepsilon + \lambda\delta + \lambda \sqrt{\frac{m + \log(\lambda/\varepsilon)}{\alpha}} \cdot (\varepsilon_{\text{dis}} + \varepsilon_{\text{score}}),$$

1044 where

$$\varepsilon_{\text{dis}} := \left( \tilde{L}\alpha + \frac{\|A\|^2}{\eta^2} \right) \left( h\tilde{L}\alpha R + \frac{h\|A\|^2 R + h\|A\|\sqrt{m}\eta}{\eta^2} + \sqrt{dh} \right).$$

1045 *Proof.* It is straightforward to verify that an admissible schedule satisfies the first two conditions of  
 1046 [Lemma C.1](#).

1047 For the third condition regarding  $R$ , our assumption states:

$$R \geq r + C \left( \frac{(m + \log \frac{\lambda}{\varepsilon}) \|A\|}{\alpha \eta^2} \left( \|A\| r + \eta \sqrt{m + \log(1/\delta)} \right) + \sqrt{\frac{d \log(d/\delta)(m + \log(\lambda/\varepsilon))}{\alpha}} \right)$$

1048 Given that  $T_i \lesssim \frac{m + \log(\lambda/\varepsilon)}{\alpha}$ , this choice of  $R$  is sufficient to satisfy the third condition in [Lemma C.1](#).

1049 Therefore, applying [Lemma C.1](#) at each step  $i$ , we obtain that with probability at least  $1 - 1/\lambda$  over  
 1050  $y_i$  and  $y_{i+1}$ :

$$\begin{aligned} & \text{TV}(x_{T_i}, p(x \mid y_{i+1})) \\ & \lesssim \varepsilon + \lambda \delta + \lambda \sqrt{T_i} \cdot \left( \left( \tilde{L} \alpha + \frac{\|A\|^2}{\eta_i^2} \right) \left( h \tilde{L} \alpha R + \frac{h \|A\|^2 R + h \|A\| \sqrt{m} \eta_i}{\eta_i^2} + \sqrt{dh} \right) + \varepsilon_{\text{score}} \right) \\ & \lesssim \varepsilon + \lambda \delta + \lambda \sqrt{\frac{m + \log(\lambda/\varepsilon)}{\alpha}} \cdot (\varepsilon_{\text{dis}} + \varepsilon_{\text{score}}). \end{aligned}$$

1051 □

1052 We also want to prove the following two lemmas:

1053 **Lemma D.3.** *Let  $p$  be a  $d$ -dimensional  $(\delta, r, R, \tilde{L}, \alpha)$  mode-centered locally well-conditioned dis-*  
 1054 *tribution. For any  $\delta \in (0, 1)$ , suppose*

$$R \geq 2\sqrt{\frac{d}{\alpha}} + \sqrt{\frac{2 \log(1/\delta)}{\alpha}}.$$

1055 *Then, suppose  $\eta_1 \geq \frac{\lambda \|A\|}{\varepsilon} \sqrt{\frac{d}{\alpha}}$ , with probability at least  $1 - \frac{1}{\lambda}$  over  $y_1$ ,*

$$\text{TV}(p(x \mid y_1), p(x)) \lesssim \varepsilon + \lambda \delta.$$

1056 **Lemma D.4.** *There exists an admissible noise such that*

$$N \lesssim \rho^2 \sqrt{m} \log(\lambda/\varepsilon) + \frac{\rho^2 \alpha R^2}{\sqrt{m}} + \frac{m^2}{m \log(\lambda/\varepsilon) + \alpha R^2} + \log \left( 2 + \frac{\lambda \sqrt{d} \rho}{\varepsilon} \right),$$

1057 *where  $\rho = \frac{\|A\|}{\eta \sqrt{\alpha}}$ .*

### 1058 D.1 The Closeness Between $p(x \mid y_1)$ and $p(x)$

1059 In this part, we prove [Lemma D.3](#), showing that any admissible schedule has a large enough  $\eta_1$ ,  
 1060 enabling us to use  $p(x)$  to approximate  $p(x \mid y_1)$ .

1061 We have the following standard information-theoretic result.

1062 **Lemma D.5.** *Let  $X \in \mathbb{R}^m$  be a random variable, and  $Y = X + \mathcal{N}(0, \eta^2 I_m)$ . Then,*

$$I(X; Y) \leq \frac{1}{2} \log \det \left( I_m + \frac{\text{Cov}(X)}{\eta^2} \right).$$

1063 **Lemma D.6.** *For any distribution  $p$  with  $\mathbb{E}_{x \sim p} [\|x - \mathbb{E} x\|^2] = m_2^2$ , we have*

$$\mathbb{E} [\text{TV}(p(x \mid y_1), p(x))] \leq \frac{\|A\| m_2}{2 \eta_1}.$$

1064 *Proof.* Note that  $\mathbb{E} [\text{KL}(p(x \mid y_i) \parallel p(x))]$  is exactly the mutual information between  $x$  and  $y_i$ . In  
 1065 addition, we have

$$\mathbb{E} [\text{KL}(p(x \mid y_i) \parallel p(x))] = I(x; y_i) \leq I(Ax; y_i) \leq \frac{1}{2} \log \det \left( I_m + \frac{\text{Cov}(Ax)}{\eta_i^2} \right) \leq \frac{\|A\|^2 m_2^2}{2 \eta_i^2}.$$

1066 By Pinsker's inequality, we have

$$\mathbb{E} [\text{TV}(p(x | y_1), p(x))] \leq \frac{\|A\|_{m_2}}{2\eta_1}.$$

1067

□

1068 **Lemma D.7.** *Let  $p$  be a  $d$ -dimensional  $(\delta, r, R, \tilde{L}, \alpha)$  mode-centered locally well-conditioned prob-*  
 1069 *ability distribution. Assume*

$$R \geq 2\sqrt{\frac{d}{\alpha}} + \sqrt{\frac{2\log(1/\delta)}{\alpha}}.$$

1070 *Then*

$$\mathbb{E}_{y_1} [\text{TV}(p(x | y_1), p(x))] \lesssim \frac{\|A\|}{\eta_1} \sqrt{\frac{d}{\alpha}} + \delta.$$

1071 *Proof.* Lemma B.14 provides an  $\alpha$ -strongly log-concave density  $\tilde{p}$  satisfying

$$\text{TV}(p, \tilde{p}) \leq 3\delta.$$

1072 For an  $\alpha$ -strongly log-concave law the Brascamp–Lieb inequality yields  $\text{Cov}_{\tilde{p}} \preceq \alpha^{-1} I_d$ ; hence

$$m_2(\tilde{p}) := (\mathbb{E}_{\tilde{p}} \|x - \mathbb{E}_{\tilde{p}} x\|^2)^{1/2} \leq \sqrt{\frac{d}{\alpha}}.$$

1073 Applying Lemma D.6 to  $\tilde{p}$  gives

$$\mathbb{E}_{y_1} [\text{TV}(\tilde{p}(x | y_1), \tilde{p}(x))] \leq \frac{\|A\|}{2\eta_1} \sqrt{\frac{d}{\alpha}}.$$

1074 Note that

$$\text{TV}(p(x | y_1), p(x)) \leq \text{TV}(p(x | y_1), \tilde{p}(x | y_1)) + \text{TV}(\tilde{p}(x | y_1), \tilde{p}(x)) + \text{TV}(\tilde{p}(x), p(x)).$$

1075 Integrating in  $y_1$  and using the elementary fact

$$\mathbb{E}_{y_1} [\text{TV}(p(x | y_1), \tilde{p}(x | y_1))] \leq \text{TV}(p, \tilde{p}),$$

1076 together with the above calculaion, yields

$$\mathbb{E}_{y_1} [\text{TV}(p(x | y_1), p(x))] \leq 3\delta + \frac{\|A\|}{2\eta_1} \sqrt{\frac{d}{\alpha}} + 3\delta.$$

1077 This proves the stated bound.

□

1078 Now we prove Lemma D.3.

1079 *Proof of Lemma D.3.* By Lemma D.7, we have

$$\mathbb{E}_{y_1} [\text{TV}(p(x | y_1), p(x))] \lesssim \frac{\|A\|}{\eta_1} \sqrt{\frac{d}{\alpha}} + \delta.$$

1080 Since all admissible noise schedules satisfy  $\eta_1 \geq \frac{\lambda\|A\|}{\varepsilon} \sqrt{\frac{d}{\alpha}}$ . This implies

$$\frac{\|A\|}{\eta_1} \sqrt{\frac{d}{\alpha}} \leq \frac{\varepsilon}{\lambda}.$$

1081 Consequently,

$$\mathbb{E}_{y_1} [\text{TV}(p(x | y_1), p(x))] \lesssim \frac{\varepsilon}{\lambda} + \delta.$$

1082 By Markov's inequality, with probability at least  $1 - \frac{1}{\lambda}$  over  $y_1$ ,

$$\text{TV}(p(x | y_1), p(x)) \lesssim \varepsilon + \lambda\delta,$$

1083 which proves the lemma.

□

## 1084 D.2 Bound for $N$ Mixing Steps

1085 In this part, we prove [Lemma D.4](#).

1086 **Lemma D.8.** *Let  $a, x_0 > 0$ , and let  $c > 0$ . Consider the number sequence*

$$x_{i+1} = (1 + \min((ax_i)^c, 1))x_i.$$

1087 *For every  $B > 0$ , let  $k(B)$  be the minimum integer  $i$  such that  $x_i \geq B$ . Then*

$$k(B) = O\left((ax_0)^{-c} + \log\left(1 + \frac{B}{x_0}\right)\right).$$

1088 *Proof.* We show in two steps that the time to go from  $x_0$  to  $1/a$ , then to  $B$ . Define

$$k_1 = \min\{i \in \mathbb{N} : x_i \geq 1/a\},$$

1089 **Bound for  $k_1$ .** We first show that  $k_1 \lesssim (ax_0)^{-c}$ . Consider the quantities

$$N_j = \min\{i \in \mathbb{N} : x_i \geq 2^j x_0\},$$

1090 and let  $j^*$  be the smallest  $j$  such that  $x_{N_j} \geq 1/a$ . If instead  $x_0 \geq 1/a$  already, then  $k_1 = 0$  and there  
1091 is nothing to prove.

1092 Assume  $x_0 < 1/a$ . For each  $j < j^*$  define

$$t_j = (2^j ax_0)^{-c}.$$

1093 We claim that

$$N_{j+1} - N_j \leq t_j.$$

1094 Indeed, for each  $j < j^*$ ,

$$\begin{aligned} x_{N_j+t_j} &\geq x_{N_j} \prod_{i=N_j}^{N_j+t_j-1} (1 + (ax_i)^c) \\ &\geq x_{N_j} \prod_{i=N_j}^{N_j+t_j-1} (1 + (ax_{N_j})^c) = x_{N_j} (1 + (ax_{N_j})^c)^{t_j}. \end{aligned}$$

1095 Since

$$(ax_{N_j})^c \geq (a \cdot 2^j x_0)^c = \frac{1}{t_j},$$

1096 we get

$$x_{N_j+t_j} \geq \left(1 + \frac{1}{t_j}\right)^{t_j} x_{N_j} \geq 2x_{N_j} \geq 2^{j+1}x_0.$$

1097 By monotonicity of the sequence  $(x_i)$ , it follows that  $N_{j+1} \leq N_j + t_j$ . Summing over  $j$  up to  $j^* - 1$   
1098 gives

$$N_{j^*} = \sum_{j=0}^{j^*-1} (N_{j+1} - N_j) \leq \sum_{j=0}^{j^*-1} (2^j ax_0)^{-c} \lesssim (ax_0)^{-c}.$$

1099 By definition,  $N_{j^*}$  is the first index  $i$  such that  $x_i \geq 1/a$ , so  $k_1 = N_{j^*} \lesssim (ax_0)^{-c}$ .

1100 **Bound to achieve  $B$ .** If  $B \leq 1/a$ , the bound already holds. Now we analyze how many steps  
1101 Note that for every  $i \geq k_1$ ,

$$x_{i+1} = (1 + \min((ax_i)^c, 1))x_i = 2x_i.$$

1102 Therefore, we have

$$x_{k_1+\log_2(B)} \geq 2^{\log_2(B/x_{k_1})} x_{k_1} \geq B.$$

1103 This proves that

$$k(B) \leq k_1 + \log_2\left(1 + \frac{B}{x_{k_1}}\right) \leq k_1 + \log_2\left(1 + \frac{B}{x_0}\right) \lesssim (ax_0)^{-c} + \log\left(1 + \frac{B}{x_0}\right).$$

1104 □

1105 **Lemma D.9.** Given parameters  $x_0, a, b > 0$ , consider sequence inductively defined by  $x_{i+1} =$   
 1106  $(1 + \gamma_i)x_i$ , where

$$\gamma_i = \min \{ \gamma_i \leq 1 : a\gamma^2 + b\gamma \leq 2x_i \}.$$

1107 Given  $B$ , let  $k(B)$  be the minimum integer  $i$  such that  $x_i \geq B$ . Then,

$$k(B) \lesssim \frac{b}{x_0} + \frac{a}{b} + \log \left( 1 + \frac{B}{x_0} \right).$$

1108 *Proof.* We do case analysis.

1109 **Case 1:**  $x_0 \geq b^2/a$ . We always choose  $\gamma_i = \sqrt{x_i/a}$ . We can verify that

$$a \left( \frac{x_i}{a} \right) + b \sqrt{\frac{x_i}{a}} \leq x_i + \sqrt{\frac{b^2}{a} \cdot x_i} \leq 2x_i,$$

1110 and this satisfies the requirement for  $\gamma_i$ . By applying [Lemma D.8](#), we have that

$$k(B) \lesssim \left( \frac{x_0}{a} \right)^{-1/2} + \log \left( 1 + \frac{B}{x_0} \right) \leq \frac{a}{b} + \log \left( 1 + \frac{B}{x_0} \right).$$

1111 **Case 2:**  $x_0 \leq B \leq b^2/a$ . We always choose  $\gamma_i = \min(x_i/b, 1)$ . We can verify that

$$a \left( \frac{x_i}{b} \right)^2 + b \left( \frac{x_i}{b} \right) \leq x_i \left( \frac{ax_i}{b^2} \right) + x_i \leq 2x_i,$$

1112 and this satisfies the requirement for  $\gamma_i$ . By applying [Lemma D.8](#), we have that

$$k(B) \lesssim (x_0/b)^{-1} + \log \left( 1 + \frac{B}{x_0} \right).$$

1113 **Case 3:**  $x_0 \leq b^2/a \leq B$ . We combine the bound for the first two cases, where we first go from  $x_0$   
 1114 to  $b^2/a$ , then go from  $b^2/a$  to  $B$ . Then we have

$$k(B) \lesssim \left( (x_0/b)^{-1} + \log \left( 1 + \frac{B}{x_0} \right) \right) + \left( \frac{a}{b} + \log \left( 1 + \frac{B}{x_0} \right) \right) \lesssim \frac{b}{x_0} + \frac{a}{b} + \log \left( 1 + \frac{B}{x_0} \right).$$

1115 □

1116 *Proof of [Lemma D.4](#).* Now we describe how we construct an admissible noise schedule. Consider  
 1117 we start from  $\eta'_1 = \eta$ , and for each  $i$ , we iteratively choose  $\gamma'_i$  to be the maximum  $\gamma \leq 1$  such that

$$\|A\|^4(f_T^2(\gamma)m + f_T(\gamma)R^2) \leq \frac{(\eta'_i)^4}{C\gamma^2},$$

1118 and then set  $\eta'_{i+1} = \sqrt{(1 + \gamma'_i)(\eta'_i)^2}$ . We continue this process until we reach  $\eta'_N \geq \frac{\lambda\|A\|}{\varepsilon} \sqrt{\frac{d}{\alpha}}$ . It is  
 1119 easy to verify that  $(\eta'_N, \eta'_{N-1}, \dots, \eta'_1)$  is an admissible noise schedule. Now we bound the number  
 1120 of iterations  $N$ .

1121 Since for all  $\gamma$ , we have  $\|A\|^4(f_T^2(\gamma)m + f_T(\gamma)R^2) \leq \|A\|^4(\sqrt{m}f_T(\gamma) + \frac{R^2}{2\sqrt{m}})^2$ , a sufficient  
 1122 condition for  $\|A\|^4(f_T^2(\gamma)m + f_T(\gamma)R^2) \leq \frac{(\eta'_i)^4}{C\gamma^2}$  is that

$$\|A\|^4(\sqrt{m}f_T(\gamma) + \frac{R^2}{2\sqrt{m}})^2 \leq \frac{(\eta'_i)^4}{C\gamma^2} \iff \|A\|^2(\sqrt{m}f_T(\gamma) + \frac{R^2}{2\sqrt{m}}) \leq \frac{(\eta'_i)^2}{C\gamma}.$$

1123 Therefore, fixing  $\eta'_i$ , we have that  $\gamma'_i$  is at least

$$\max \left\{ \gamma \leq 1 : \frac{\|A\|^2 m^{1.5}}{\alpha} \gamma^2 + \left( \frac{\|A\|^2 \sqrt{m} \log(\lambda/\varepsilon)}{\alpha} + \frac{\|A\|^2 R^2}{\sqrt{m}} \right) \gamma \leq \frac{(\eta'_i)^2}{C} \right\}.$$

1124 Now we look at the inductive sequence starting from  $x_1 = \eta^2$ , and  $x_{i+1} = (1 + \tilde{\gamma}_i)x_i$ , where

$$\tilde{\gamma}_i = \max \left\{ \gamma \leq 1 : \frac{\|A\|^2 m^{1.5}}{\alpha} \gamma^2 + \left( \frac{\|A\|^2 \sqrt{m} \log(\lambda/\varepsilon)}{\alpha} + \frac{\|A\|^2 R^2}{\sqrt{m}} \right) \gamma \leq \frac{x_i}{C} \right\}.$$

1125 By [Lemma D.9](#), we know that for any  $\eta_{goal} > 0$ , we can achieve  $x_N \geq \eta_{goal}^2$  within

$$N \lesssim \frac{\|A\|^2 \sqrt{m} \log(\lambda/\varepsilon)}{\alpha \eta^2} + \frac{\|A\|^2 R^2}{\sqrt{m} \eta^2} + \frac{m^2}{m \log(\lambda/\varepsilon) + \alpha R^2} + \log \left( 2 + \frac{\eta_{goal}}{\eta} \right).$$

1126 Taking in  $\eta_{goal} = \frac{\lambda \|A\|}{\varepsilon} \sqrt{\frac{d}{\alpha}}$ , we conclude the lemma.  $\square$

## 1127 E Theoretical Analysis of [Algorithm 1](#)

1128 In this section, we analyze the algorithm presented in [Algorithm 1](#). In [Line 7](#), the algorithm initial-  
 1129 izes by drawing a sample from the prior distribution  $p(x)$  via the diffusion SDE, which introduces  
 1130 sampling error. [\[CCL<sup>+</sup>22\]](#) demonstrated that this diffusion sampling error is polynomially small,  
 1131 with the exact magnitude depending on the discretization scheme chosen for the diffusion SDE.  
 1132 Since the focus of this paper is on enabling an unconditional diffusion sampling model to perform  
 1133 posterior sampling, the choice of diffusion discretization and its associated error are not the focus  
 1134 of our analysis. Consequently, we omit the diffusion sampling error in the error analysis presented  
 1135 in this section. This omission does not impact the rigor of the theorems in the main paper, as the  
 1136 error is polynomially small.

1137 We start with the following lemma:

1138 **Lemma E.1.** *Let  $C > 0$  be a large enough constant. Let  $p$  be a  $(\delta, r, R, \tilde{L}, \alpha)$  mode-centered locally  
 1139 well-conditioned distribution. For every  $\delta, \varepsilon \in (0, 1)$  and  $\lambda > 1$ , suppose*

$$R \geq r + C \left( \frac{(m + \log \frac{\lambda}{\varepsilon}) \|A\|}{\alpha \eta^2} \left( \|A\| r + \eta \sqrt{m + \log(1/\delta)} \right) + \sqrt{\frac{d \log(d/\delta) (m + \log(\lambda/\varepsilon))}{\alpha}} \right).$$

1140 Then running [Algorithm 1](#) will guarantee that

$$\Pr_{y_1, \dots, y_N} \left[ \text{TV}(X_N, p(x | y)) \lesssim N \left( \varepsilon + \lambda \delta + \lambda \sqrt{\frac{m + \log(\lambda/\varepsilon)}{\alpha}} \cdot (\varepsilon_{dis} + \varepsilon_{score}) \right) \right] \geq 1 - \frac{N}{\lambda},$$

1141 where

$$\varepsilon_{dis} := \left( \tilde{L} \alpha + \frac{\|A\|^2}{\eta^2} \right) \left( h \tilde{L} \alpha R + \frac{h \|A\|^2 R + h \|A\| \sqrt{m} \eta}{\eta^2} + \sqrt{d h} \right).$$

1142 *Proof.* Let  $\varepsilon_{step} := C_0 \left( \varepsilon + \lambda \delta + \lambda \sqrt{\frac{m + \log(\lambda/\varepsilon)}{\alpha}} \cdot (\varepsilon_{dis} + \varepsilon_{score}) \right)$ , where  $C_0$  is a constant large  
 1143 enough to absorb the implicit constants in [Lemma D.3](#) and [Lemma D.2](#).

1144 We prove by induction that for each  $i \in [N]$ :

$$\Pr_{y_1, \dots, y_i} [\text{TV}(X_i, p(x | y_i)) \leq i \cdot \varepsilon_{step}] \geq 1 - \frac{i}{\lambda}. \quad (11)$$

1145 For the base case ( $i = 1$ ), since  $X_1 \sim p(x)$ , [Lemma D.3](#) gives that  $\text{TV}(p(x), p(x | y_1)) \leq \varepsilon_{step}$  with  
 1146 probability at least  $1 - 1/\lambda$  over  $y_1$ .

1147 For the inductive step, assume the statement holds for some  $i < N$ . Let  $\mathcal{E}_i$  be the event that  
 1148  $\text{TV}(X_i, p(x | y_i)) \leq i \cdot \varepsilon_{step}$ , so  $\Pr[\mathcal{E}_i^c] \leq i/\lambda$ .

1149 Let  $X_i^* \sim p(x | y_i)$  and let  $X_{i+1}^*$  be the result of evolving  $X_i^*$  for time  $T_i$  using the SDE in  
 1150 [Equation \(2\)](#). By [Lemma D.2](#), the event  $\mathcal{F}_{i+1}$  that  $\text{TV}(X_{i+1}^*, p(x | y_{i+1})) \leq \varepsilon_{step}$  has probability at  
 1151 least  $1 - 1/\lambda$  over  $y_i, y_{i+1}$  and the SDE path.

1152 By the triangle inequality and data processing inequality:

$$\text{TV}(X_{i+1}, p(x | y_{i+1})) \leq \text{TV}(X_i, p(x | y_i)) + \text{TV}(X_{i+1}^*, p(x | y_{i+1})). \quad (12)$$

1153 If both  $\mathcal{E}_i$  and  $\mathcal{F}_{i+1}$  occur, then  $\text{TV}(X_{i+1}, p(x | y_{i+1})) \leq (i+1)\varepsilon_{\text{step}}$ . The probability that this  
1154 bound fails is at most:

$$\begin{aligned} \Pr[\mathcal{E}_i^c \cup \mathcal{F}_{i+1}^c] &\leq \Pr[\mathcal{E}_i^c] + \mathbb{E}_{y_1, \dots, y_i}[\mathbf{1}_{\mathcal{E}_i} \Pr[\mathcal{F}_{i+1}^c | y_1, \dots, y_i]] \\ &\leq \frac{i}{\lambda} + \frac{1}{\lambda} = \frac{i+1}{\lambda}. \end{aligned}$$

1155 Thus, the induction holds for  $i+1$ , and the lemma follows for  $i=N$ .  $\square$

1156 **Lemma E.2.** Let  $S_1$  and  $S_2$  be two random variables such that

$$\Pr_{y_1, \dots, y_N} [\text{TV}((S_1 | y_1, \dots, y_N), (S_2 | y_1, \dots, y_N)) \leq \varepsilon] \geq 1 - \delta.$$

1157 Then we have

$$\Pr_{y_N} [\text{TV}((S_1 | y_N), (S_2 | y_N)) \leq 2\varepsilon] \geq 1 - \frac{\delta}{\varepsilon}.$$

1158 *Proof.* Let  $E(y_1, \dots, y_N)$  be the event such that  $\text{TV}((S_1 | E), p((S_2 | E))) \leq \varepsilon$ . Then, we have  
1159 that

$$\text{TV}((S_1 | y_N), (S_2 | y_N)) \leq \Pr[\overline{E} | y_N] + \varepsilon.$$

1160 Since  $\Pr[E] \geq 1 - \delta$ , we apply Markov's inequality, and have

$$\Pr_y [\Pr[\overline{E} | y_N] \geq \varepsilon] \leq \frac{\mathbb{E}_y [\Pr[\overline{E} | y_N]]}{\varepsilon} = \frac{\Pr[\overline{E}]}{\varepsilon} \leq \frac{\delta}{\varepsilon}.$$

1161 Hence, we have with probability  $1 - \frac{\delta}{\varepsilon}$  over  $y$ ,

$$\text{TV}((S_1 | y_N), (S_2 | y_N)) \leq 2\varepsilon.$$

1162  $\square$

1163 Applying [Lemma E.2](#) on [Lemma E.1](#) gives the following corollary.

1164 **Corollary E.3.** Let  $C > 0$  be a large enough constant. Let  $p$  be a  $(\delta, r, R, \tilde{L}, \alpha)$  mode-centered  
1165 locally well-conditioned distribution. For every  $\delta, \varepsilon \in (0, 1)$  and  $\lambda > 1$ , suppose

$$R \geq r + C \left( \frac{(m + \log \frac{\lambda}{\varepsilon}) \|A\|}{\alpha \eta^2} \left( \|A\| r + \eta \sqrt{m + \log(1/\delta)} \right) + \sqrt{\frac{d \log(d/\delta) (m + \log(\lambda/\varepsilon))}{\alpha}} \right).$$

1166 Define Then running [Algorithm 1](#) will guarantee that

$$\Pr_y [\text{TV}(X_N, p(x | y)) \leq \varepsilon_{\text{error}}] \geq 1 - \frac{N}{\lambda \varepsilon_{\text{error}}},$$

1167 with

$$\varepsilon_{\text{error}} \lesssim N \left( \varepsilon + \lambda \delta + \lambda \sqrt{\frac{m + \log(\lambda/\varepsilon)}{\alpha}} \cdot (\varepsilon_{\text{dis}} + \varepsilon_{\text{score}}) \right),$$

1168 where

$$\varepsilon_{\text{dis}} := \left( \tilde{L} \alpha + \frac{\|A\|^2}{\eta^2} \right) \left( h \tilde{L} \alpha R + \frac{h \|A\|^2 R + h \|A\| \sqrt{m} \eta}{\eta^2} + \sqrt{d} h \right).$$

1169 **Lemma E.4** (Main Analysis Lemma for [Algorithm 1](#)). Let  $\rho = \frac{\|A\|}{\eta \sqrt{\alpha}}$ . For all  $0 < \varepsilon, \delta < 1$ , there  
1170 exists

$$K \leq \tilde{O} \left( \frac{1}{\varepsilon \delta} \left( \frac{\rho^2 ((m^2 \rho^4 + 1) \tilde{r}^2 + m^3 \rho^2 + dm)}{\sqrt{m}} + \frac{m}{d} + \log d \right) \right)$$



1171 such that: suppose distribution  $p$  is a  $(\frac{\varepsilon}{K^2}, \tilde{r}/\sqrt{\alpha}, R, \tilde{L}, \alpha)$  mode-centered locally well-conditioned  
 1172 distribution with  $R \geq \frac{\sqrt{K\sqrt{m}/\alpha}}{\rho}$ , and  $\varepsilon_{\text{score}} \leq \frac{\sqrt{\alpha/m}}{K^2\delta}$ ; then [Algorithm 1](#) samples from a distribution  
 1173  $\hat{p}(x | y)$  such that

$$\Pr_y [\text{TV}(\hat{p}(x | y), p(x | y)) \leq \varepsilon] \geq 1 - \delta.$$

1174 Furthermore, the total iteration complexity can be bounded by

$$\tilde{O}\left(K^3(K^2m^2d + m^3\rho + m^{1.5}(m\rho^2 + 1)\tilde{r})(\tilde{L} + \rho^2)^2 + K^3m^2\rho(\tilde{L} + \rho^2)\right).$$

1175 *Proof.* To distinguish the  $\varepsilon$  and  $\delta$  in the lemma and the one in [Corollary E.3](#), we will use  $\varepsilon_{\text{error}}$  and  
 1176  $\delta_{\text{error}}$  to denote the  $\varepsilon$  and  $\delta$  in our lemma statement. We need to set parameters in [Corollary E.3](#).  
 1177 For any given  $0 < \delta_{\text{error}}, \varepsilon_{\text{error}}$ , we set

$$\varepsilon = \frac{1}{\lambda\delta_{\text{error}}}, \quad \delta = \frac{\varepsilon_{\text{error}}}{\lambda^2},$$

1178 and we set  $\lambda$  to be the minimum  $\lambda$  that satisfies

$$\rho^2\sqrt{m}\log(\lambda/\varepsilon) + \frac{\rho^2\alpha R^2}{\sqrt{m}} + \frac{m^2}{m\log(\lambda/\varepsilon) + \alpha R^2} + \log\left(2 + \frac{\lambda\sqrt{d}\rho}{\varepsilon}\right) \leq \lambda\delta_{\text{error}}\varepsilon_{\text{error}}.$$

1179 Now we verify the correctness. Taking in the bound for  $N$  in [Lemma D.4](#), we have

$$N \lesssim \rho^2\sqrt{m}\log(\lambda/\varepsilon) + \frac{\rho^2\alpha R^2}{\sqrt{m}} + \frac{m^2}{m\log(\lambda/\varepsilon) + \alpha R^2} + \log\left(2 + \frac{\lambda\sqrt{d}\rho}{\varepsilon}\right) \leq \lambda\delta_{\text{error}}\varepsilon_{\text{error}}.$$

1180 By the setting of our parameters, we have  $N\varepsilon \lesssim \varepsilon_{\text{error}}$ ,  $\lambda\delta \lesssim \varepsilon_{\text{error}}$ , and  $N/\lambda\varepsilon_{\text{error}} \lesssim \delta_{\text{error}}$ .  
 1181 This guarantees that

$$\Pr_y \left[ \text{TV}(\tilde{X}_N, p(x | y)) \lesssim \varepsilon_{\text{error}} + \lambda N \sqrt{\frac{m + \log(\lambda/\varepsilon)}{\alpha}} \cdot (\varepsilon_{\text{dis}} + \varepsilon_{\text{score}}) \right] \geq 1 - \delta_{\text{error}}.$$

1182 It is easy to verify our bound on  $R$  satisfies the condition in [Corollary E.3](#). Note that if a distribu-  
 1183 tion is  $(\delta, r, R, \tilde{L}, \alpha)$  mode-centered locally well-conditioned, then it is also  $(\delta, r, R', \tilde{L}, \alpha)$  mode-  
 1184 centered locally well-conditioned for any  $R' \leq R$ . Therefore, we can set  $R$  to be the minimum  $R$   
 1185 that satisfies the condition.

$$\begin{aligned} \lambda &= \tilde{O}\left(\frac{1}{\varepsilon_{\text{error}}\delta_{\text{error}}}\left(\rho^2\sqrt{m} + \frac{\rho^2\alpha R^2}{\sqrt{m}} + \frac{m^2}{m + \alpha R^2} + \log d\right)\right) \\ &= \tilde{O}\left(\frac{1}{\varepsilon_{\text{error}}\delta_{\text{error}}}\left(\frac{\rho^2((m^2\rho^4 + 1)\tilde{r}^2 + m^3\rho^2 + dm)}{\sqrt{m}} + \frac{m}{d} + \log d\right)\right) \\ &\lesssim K. \end{aligned}$$

1186 Therefore, we only need  $\lambda N \sqrt{\frac{m + \log(\lambda/\varepsilon)}{\alpha}}(\varepsilon_{\text{dis}} + \varepsilon_{\text{score}}) \lesssim \varepsilon_{\text{error}}$ . This can be satisfied when

$$\varepsilon_{\text{dis}} + \varepsilon_{\text{score}} \lesssim \frac{1}{\lambda^2\delta_{\text{error}}}\sqrt{\frac{\alpha}{\log(\lambda/\varepsilon) + m}} \lesssim \frac{\sqrt{\alpha/m}}{K^2\delta_{\text{error}}}.$$

1187 Recall that

$$\begin{aligned} \varepsilon_{\text{dis}} &= \left(\tilde{L}\alpha + \frac{\|A\|^2}{\eta^2}\right)\left(h\tilde{L}\alpha R + \frac{h\|A\|^2 R + h\|A\|\sqrt{m}\eta}{\eta^2} + \sqrt{dh}\right) \\ &\leq \alpha(\tilde{L} + \rho^2)\left(h\tilde{L}\alpha R + h\rho^2\alpha R + h\rho\sqrt{m\alpha} + \sqrt{dh}\right). \end{aligned}$$

1188 Therefore, we need to set

$$h = \tilde{\Omega}\left(\min\left\{\frac{1}{K^2\delta_{\text{error}}}\frac{\sqrt{\alpha/m}}{\alpha(\tilde{L} + \rho^2)[\alpha R(\tilde{L} + \rho^2) + \rho\sqrt{m\alpha}]}, \frac{1}{K^4\delta_{\text{error}}^2\alpha m d(\tilde{L} + \rho^2)^2}\right\}\right).$$

1189 Note that the bound for the sum of  $N$  mixing times can be bounded by

$$\sum_{i=1}^{N-1} T_i \lesssim \frac{N(\log(\lambda/\varepsilon) + m)}{\alpha} \leq \tilde{O}\left(\frac{Km\delta_{\text{error}}\varepsilon_{\text{error}}}{\alpha}\right).$$

1190 Therefore, the total iteration complexity is bounded by  $\tilde{O}(\frac{Km\delta_{\text{error}}\varepsilon_{\text{error}}}{\alpha h})$ ,

$$\tilde{O}\left(K^3m(\tilde{L} + \rho^2)[\alpha R(\tilde{L} + \rho^2) + \rho\sqrt{m\alpha}]\sqrt{m/\alpha}\varepsilon_{\text{error}}^2\delta_{\text{error}} + K^5m^2d(\tilde{L} + \rho^2)^2\varepsilon_{\text{error}}\delta_{\text{error}}^3\right).$$

1191 We can relax it and make the bound be

$$\tilde{O}\left(K^3(K^2m^2d + \sqrt{m^3\alpha}R)(\tilde{L} + \rho^2)^2 + K^3m^2\rho(\tilde{L} + \rho^2)\right).$$

1192 Take in  $R$ , and we have

$$\tilde{O}\left(K^3(K^2m^2d + m^3\rho + m^{1.5}(m\rho^2 + 1)\tilde{r})(\tilde{L} + \rho^2)^2 + K^3m^2\rho(\tilde{L} + \rho^2)\right).$$

1193 □

## 1194 E.1 Application on Strongly Log-concave Distributions

1195 By [Lemma B.12](#), any  $\alpha$ -strongly log-concave distribution that has  $L$ -Lipschitz score is locally  
1196 well-conditioned distribution  $p$  is  $(\delta, 2\sqrt{\frac{d}{\alpha}} + \sqrt{\frac{2\log(1/\delta)}{\alpha}}, \infty, L/\alpha, \alpha)$  mode-centered locally well-  
1197 conditioned. Therefore, take this into [Lemma E.4](#), we have the following result.

1198 **Lemma E.5.** *Let  $p(x)$  be an  $\alpha$ -strongly log-concave distribution over  $\mathbb{R}^d$  with  $L$ -Lipschitz score.*  
1199 *Let  $\rho = \frac{\|A\|}{\eta\sqrt{\alpha}}$ . For all  $0 < \varepsilon, \delta < 1$ , there exists*

$$K \leq \tilde{O}\left(\frac{1}{\varepsilon\delta}\left(\frac{\rho^2((m^2\rho^4 + m)d + m^3\rho^2)}{\sqrt{m}} + \frac{m}{d} + \log d\right)\right)$$

1200 *such that: suppose  $\varepsilon_{\text{score}} \leq \frac{\sqrt{\alpha/m}}{K^2\delta}$ , then [Algorithm 1](#) samples from a distribution  $\hat{p}(x | y)$  such that*

$$\Pr_y[\text{TV}(\hat{p}(x | y), p(x | y)) \leq \varepsilon] \geq 1 - \delta.$$

1201 *Furthermore, the total iteration complexity can be bounded by*

$$\tilde{O}\left(K^3(K^2m^2d + m^3\rho + m^{1.5}(m\rho^2 + 1)\sqrt{d})(L/\alpha + \rho^2)^2 + K^3m^2\rho(L/\alpha + \rho^2)\right).$$

1202 To enhance clarity, we state our result in terms of expectation and established the following theorem:

1203 **Theorem E.6** (Posterior sampling with global log-concavity). *Let  $p(x)$  be an  $\alpha$ -strongly log-*  
1204 *concave distribution over  $\mathbb{R}^d$  with  $L$ -Lipschitz score. Let  $\rho = \frac{\|A\|}{\eta\sqrt{\alpha}}$ . For all  $0 < \varepsilon < 1$ , there*  
1205 *exists*

$$K \leq \tilde{O}\left(\frac{1}{\varepsilon^2}\left(\frac{\rho^2((m^2\rho^4 + m)d + m^3\rho^2)}{\sqrt{m}} + \frac{m}{d} + \log d\right)\right)$$

1206 *such that: suppose  $\varepsilon_{\text{score}} \leq \frac{\sqrt{\alpha/m}}{K^2\varepsilon}$ , then [Algorithm 1](#) samples from a distribution  $\hat{p}(x | y)$  such that*

$$\mathbb{E}_y[\text{TV}(\hat{p}(x | y), p(x | y))] \leq \varepsilon.$$

1207 *Furthermore, the total iteration complexity can be bounded by*

$$\tilde{O}\left(K^3(K^2m^2d + m^3\rho + m^{1.5}(m\rho^2 + 1)\sqrt{d})(L/\alpha + \rho^2)^2 + K^3m^2\rho(L/\alpha + \rho^2)\right).$$

1208 This gives [Theorem 1.1](#).

**Theorem 1.1** (Posterior sampling with global log-concavity). *Let  $p(x)$  be an  $\alpha$ -strongly log-concave distribution over  $\mathbb{R}^d$  with  $L$ -Lipschitz score. For any  $0 < \varepsilon < 1$ , there exists  $K_1 = \text{poly}(d, m, \frac{\|A\|}{\eta\sqrt{\alpha}}, \frac{1}{\varepsilon})$  and  $K_2 = \text{poly}(d, m, \frac{\|A\|}{\eta\sqrt{\alpha}}, \frac{1}{\varepsilon}, \frac{L}{\alpha})$  such that: if  $\varepsilon_{\text{score}} \leq \frac{\sqrt{\alpha}}{K_1}$ , then there exists an algorithm that takes  $K_2$  iterations to sample from a distribution  $\hat{p}(x | y)$  with*

$$\mathbb{E} [\text{TV}(\hat{p}(x | y), p(x | y))] \leq \varepsilon.$$

**Remark E.7.** *The analysis above is restricted to strongly log-concave distributions, where  $\nabla^2 \log p(x) \prec 0$ . However, this directly implies that we can use our algorithm to perform posterior sampling on log-concave distributions, for which  $\nabla^2 \log p(x) \preceq 0$ .*

*Specifically, for any log-concave distribution  $p$ , we can define a distribution  $q(x) \propto p(x) \cdot \exp\left(-\frac{\varepsilon^2 \|x - \theta\|^2}{2m_2^2}\right)$ , where  $\theta$  is the mode of  $p$  and  $m_2^2$  is the variance of  $p$ . It is straightforward to verify that  $\text{TV}(p, q) \lesssim \varepsilon$ , and  $q$  is  $(\varepsilon^2/m_2^2)$ -strongly log-concave. Therefore, by sampling from  $q(x | y)$ , we can approximate  $p(x | y)$ , incurring an additional expected TV error of  $\varepsilon$ .*

## 1220 E.2 Gaussian Measurement

In this section, we prove [Theorem 1.2](#). In [Algorithm 2](#), we describe how to make [Algorithm 1](#) work on the Gaussian case.

We first verify that suppose [Assumption 1](#) holds, we can also have  $L^4$ -accurate estimates for the smoothed scores of  $p_{x_0}$ , so this satisfies the requirement of running [Algorithm 1](#). We need to use the following lemma, with proof deferred to [Appendix E.5](#).

**Lemma E.8.** *Let  $X, Y$ , and  $Z$  be random vectors in  $\mathbb{R}^d$ , where  $Y = X + N(0, \sigma_1^2 I_d)$  and  $Z = X + N(0, \sigma_2^2 I_d)$ . The conditional density of  $Z$  given  $Y$ , denoted  $p(Z | Y)$ , is a multivariate normal distribution with mean*

$$\mu_{Z|Y} = \sigma_2^2(\sigma_1^2 + \sigma_2^2)^{-1}Y$$

and covariance matrix

$$\Sigma_{Z|Y} = \sigma_2^2(\sigma_1^2 + \sigma_2^2)^{-1}\sigma_1^2.$$

Then, the gradient of the log-likelihood  $\log p(Z | Y)$  with respect to  $Y$  is given by

$$\nabla_Y \log p(Z | Y) = -\frac{1}{\sigma_1^2} (Z - \sigma_2^2(\sigma_1^2 + \sigma_2^2)^{-1}Y).$$

Using this, we can calculate the smoothed conditional score given  $x_0$ :

**Lemma E.9.** *For any smoothing level  $t \geq 0$ , suppose we have score estimate  $\hat{s}_{t^2}(x)$  of the smoothed distributions  $p_{t^2}(x) = p(x) * \mathcal{N}(0, t^2 I_d)$  that satisfies*

$$\mathbb{E}_{p_{t^2}(x)} [\|\hat{s}_{t^2}(x) - s_{t^2}(x)\|^4] \leq \varepsilon_{\text{score}}^4.$$

Then we can calculate a score estimate  $\hat{s}_{x_0, t^2}(x)$  of the distribution  $p_{x_0, t^2}(x) = p_{x_0}(x) * \mathcal{N}(0, t^2 I_d)$  such that

$$\mathbb{E}_{x_0} \left[ \mathbb{E}_{p_{x_0, t^2}(x)} [\|\hat{s}_{x_0, t^2}(x) - s_{x_0, t^2}(x)\|^4] \right] \leq \varepsilon_{\text{score}}^4.$$

*Proof.* Let  $x^{(t)} \sim p_{t^2}$ . Then, for any value of  $x^{(t)}$ , we have

$$\begin{aligned} s_{x_0, t^2}(x^{(t)}) &= \nabla_{x^{(t)}} \log p(x^{(t)} | x_0) \\ &= \nabla_{x^{(t)}} \log p(x^{(t)}) + \nabla_{x^{(t)}} \log p(x_0 | x^{(t)}) \\ &= s_{t^2}(x^{(t)}) + \nabla_{x^{(t)}} \log p(x_0 | x^{(t)}). \end{aligned}$$

Note that the second term is exactly in the form of [Lemma E.8](#), so we can calculate this exactly. For the first term, we use our score estimate  $\hat{s}_{t^2}(x^{(t)})$  for it. In this way, we have that for any  $x$ ,

$$\|\hat{s}_{x_0, t^2}(x) - s_{x_0, t^2}(x)\| = \|\hat{s}_{t^2}(x) - s_{t^2}(x)\|.$$

1239 Therefore,

$$\mathbb{E}_{x_0} \left[ \mathbb{E}_{p_{x_0, t^2}(x)} [\|\hat{s}_{x_0, t^2}(x) - s_{x_0, t^2}(x)\|^4] \right] = \mathbb{E}_{p_{t^2}(x)} [\|\hat{s}_{x_0, t^2}(x) - s_{x_0, t^2}(x)\|^4] \leq \varepsilon_{score}^4.$$

1240 □

1241 Applying Markov's inequality, we have:

1242 **Corollary E.10.** Suppose [Assumption 1](#) holds for our prior distribution  $p$ . Then with  $1 - \delta$  prob-  
1243 ability over  $x_0$ : we have smoothed score estimates for  $p_{x_0}$  with  $L^4$  error bounded by  $\varepsilon_{score}^4/\delta$ ; in  
1244 other words, [Assumption 1](#) holds for  $p_{x_0}$ , where  $\varepsilon_{score}$  is substituted with  $\varepsilon_{score}/\delta^{1/4}$ .

1245 To capture the behavior of a Gaussian measurement more accurately, we first define a relaxed version  
1246 of mode-centered locally well-conditioned distribution.

1247 **Definition E.11.** For  $\delta \in [0, 1)$  and  $R, \tilde{L}, \alpha \in (0, +\infty]$ , we say that a distribution  $p$  is  $(\delta, r, R, \tilde{L}, \alpha)$   
1248 locally well-conditioned if there exists  $\theta$  such that

- 1249 •  $\Pr_{x \sim p} [x \in B(\theta, r)] \geq 1 - \delta$ .
- 1250 • For  $x, y \in B(\theta, R)$ , we have that  $\|s(x) - s(y)\| \leq \tilde{L}\alpha \|x - y\|$ .
- 1251 • For  $x, y \in B(\theta, R)$ , we have that  $\langle s(y) - s(x), x - y \rangle \geq \alpha \|x - y\|^2$ .

1252 Note that this definition can still imply that the distribution is mode-centered local well-conditioned,  
1253 due to the following fact:

1254 **Lemma E.12.** Let  $p$  be a probability density on  $\mathbb{R}^d$ . Fix  $0 < r < R$  and  $\theta \in \mathbb{R}^d$  such that

$$\Pr_{x \sim p} [x \in B(\theta, r)] \geq 0.9, \quad \nabla^2(-\log p(x)) \succeq \alpha I_d \quad (x \in B(\theta, R)), \quad \alpha > 0.$$

1255 If  $R > 4dr$ , then there exists  $\theta' \in B(\theta, 4dr)$  with  $\nabla \log p(\theta') = 0$ .

1256 We defer its proof to [Appendix E.5](#). This implies the following lemma:

1257 **Lemma E.13.** Let  $p$  be a  $(\delta, r, R, \tilde{L}, \alpha)$  locally well conditioned distribution with  $R > 9dr$  and  
1258  $\delta < 0.1$ . Then  $p$  is  $(\delta, (4d + 1)r, R - 4dr, \tilde{L}, \alpha)$  mode-centered locally well conditioned.

1259 This gives a version of [Lemma E.4](#) for locally well-conditioned distributions as a corollary:

1260 **Lemma E.14.** Let  $\rho = \frac{\|A\|}{\eta\sqrt{\alpha}}$ . For all  $0 < \varepsilon, \delta < 1$ , there exists

$$K \leq \tilde{O} \left( \frac{1}{\varepsilon\delta} \left( \frac{\rho^2 ((m^2\rho^4 + 1) d^2 \tilde{r}^2 + m^3\rho^2 + dm)}{\sqrt{m}} + \frac{m}{d} + \log d \right) \right)$$

1261 such that: suppose distribution  $p$  is a  $(\frac{\varepsilon}{K^2}, \tilde{r}/\sqrt{\alpha}, R, \tilde{L}, \alpha)$  mode-centered locally well-conditioned  
1262 distribution with  $R \geq \frac{\sqrt{K\sqrt{m}/\alpha}}{\rho}$ , and  $\varepsilon_{score} \leq \frac{\sqrt{\alpha/m}}{K^2\delta}$ . Then [Algorithm 1](#) samples from a distribu-  
1263 tion  $\hat{p}(x | y)$  such that

$$\Pr_y [\text{TV}(\hat{p}(x | y), p(x | y)) \leq \varepsilon] \geq 1 - \delta.$$

1264 Furthermore, the total iteration complexity can be bounded by

$$\tilde{O} \left( K^3 (K^2 m^2 d + m^3 \rho + m^{1.5} (m \rho^2 + 1) \tilde{r}) (\tilde{L} + \rho^2)^2 + K^3 m^2 \rho (\tilde{L} + \rho^2) \right).$$

1265 The reason we want this relaxed notion of locally well-conditioned is that, this captures the behavior  
1266 of a Gaussian measurement. First note that:

1267 **Lemma E.15.** Let  $p$  be a distribution on  $\mathbb{R}^d$ . Let  $\tilde{x} = x_{true} + N(0, \sigma^2 I_d)$  be a Gaussian measure-  
1268 ment of  $x_{true} \sim p$ . Let  $p_{\tilde{x}}(x)$  be the posterior distribution of  $x$  given  $\tilde{x}$ . Then, for any  $\delta \in (0, 1)$   
1269 and  $\delta' \in (0, 1)$ , with probability at least  $1 - \delta'$  over  $\tilde{x}$ ,

$$\Pr_{x \sim p_{\tilde{x}}} [x \in B(\tilde{x}, r)] \geq 1 - \delta$$

1270 for  $r = \sigma(\sqrt{d} + \sqrt{2 \log \frac{1}{\delta\delta'}})$ .

---

**Algorithm 2** Sampling from  $p(x \mid x_0, y)$  given an extra Gaussian measurement  $x_0$

---

1: **function** GAUSSIANSAMPLER( $p : \mathbb{R}^d \rightarrow \mathbb{R}, x_0 \in \mathbb{R}^d, y \in \mathbb{R}^m, A \in \mathbb{R}^{m \times d}, \eta, \sigma \in \mathbb{R}$ )  
 2:   Let  $p_{x_0}(x) := p(x \mid x + \mathcal{N}(0, \sigma^2 I_d) = x_0)$ .  
 3:   Use [Algorithm 1](#), return

POSTERIORSAMPLER( $p_{x_0}, y, A, \eta$ ).

4: **end function**

---

1271 Again, we defer its proof to [Appendix E.5](#). This implies the following lemma.

1272 **Lemma E.16.** For  $\delta \in (0, 1)$ , suppose  $p$  is a distribution over  $\mathbb{R}^d$  such that

$$\Pr_{x' \sim p} [\forall x \in B(x', R) : -LI_d \preceq \nabla^2 \log p(x) \preceq (\tau^2/R^2)I_d] \geq 1 - \delta.$$

1273 Given a Gaussian measurement  $x_0 = x + \mathcal{N}(0, \sigma^2 I_d)$  of  $x \sim p$  with

$$\sigma \leq \frac{R}{2\sqrt{d} + \sqrt{2\log(1/\delta)} + 2\tau}.$$

1274 Let  $x_0 = x + \mathcal{N}(0, \sigma^2 I_d)$ , where  $x \sim p$ . Then, suppose  $R$ . with probability at least  $1 - 3\delta$  probability

1275 over  $x_0, p_{x_0}$  is  $(\delta, \sigma(\sqrt{d} + \sqrt{4\log(1/\delta)}), R/2, 2L\sigma^2 + 2, \frac{1}{2\sigma^2})$  locally well-conditioned.

1276 *Proof.* Let us check the locally well-conditioned conditions with  $\theta = x_0$  one by one. The concen-  
 1277 tration follows directly from [Lemma E.15](#), incurring an error probability of  $\delta$ .

1278 By our choice of  $\sigma$ , we have that

$$\Pr \left[ \|x_0 - x\| \leq \frac{R}{2} \right] \geq 1 - \delta.$$

1279 Therefore,

$$\Pr [\forall x \in B(x_0, R/2) : -LI_d \preceq \nabla^2 \log p(x) \preceq (\tau^2/R^2)I_d] \geq 1 - 2\delta.$$

1280 By direct calculation, we have that

$$-LI_d \preceq \nabla^2 \log p(x) \preceq (\tau^2/R^2)I_d \implies -(L + 1/\sigma^2)I_d \preceq \nabla^2 \log p(x) \preceq (\tau^2/R^2 - \frac{1}{\sigma^2})I_d$$

1281 By our choice of  $\sigma$ , we have that whenever  $-LI_d \preceq \nabla^2 \log p(x) \preceq (\tau^2/R^2)I_d$ ,

$$-(2L\sigma^2 + 2)\frac{1}{2\sigma^2}I_d \preceq \nabla^2 \log p(x) \preceq -\frac{1}{2\sigma^2}I_d$$

1282 This satisfies the Lipschitzness and the strong log-concavity condition by giving an additional error  
 1283 probability of  $2\delta$ .  $\square$

1284 This gives us the main lemma for our local log-concavity case:

1285 **Lemma E.17.** For any  $\delta, \varepsilon, \tau, \sigma, R, L > 0$ , suppose  $p(x)$  is a distribution over  $\mathbb{R}^d$  such that

$$\Pr_{x' \sim p} [\forall x \in B(x', R) : -LI_d \preceq \nabla^2 \log p(x) \preceq (\tau^2/R^2)I_d] \geq 1 - \delta.$$

1286 Let  $\rho = \frac{\|A\|\sigma}{\eta}$ . There exists

$$K \leq \tilde{O} \left( \frac{1}{\varepsilon\delta} \left( \frac{\rho^2 ((m^2\rho^4 + 1)d^3 + m^3\rho^2 + dm)}{\sqrt{m}} + \frac{m}{d} + \log d \right) \right).$$

1287 such that: suppose  $R^2 \geq (\frac{K\sqrt{m}}{\rho^2} + 4\tau)\sigma^2$  and  $\varepsilon_{\text{score}} \leq \frac{1}{K^2\sqrt{m}\sigma}$ , then [Algorithm 2](#) samples from a  
 1288 distribution  $\hat{p}(x \mid x_0, y)$  such that

$$\Pr_{x_0, y} [\text{TV}(\hat{p}(x \mid x_0, y), p(x \mid x_0, y)) \leq \varepsilon] \geq 1 - O(\delta).$$

1289 Furthermore, the total iteration complexity can be bounded by

$$\tilde{O} \left( K^3(K^2m^2d + m^3\rho + m^{1.5}(m\rho^2 + 1)\sqrt{d})(L\sigma^2 + \rho^2 + 1)^2 + K^3m^2\rho(L\sigma^2 + \rho^2 + 1) \right).$$

---

**Algorithm 3** Competitive Compressed Sensing Algorithm Given a Rough Estimation

---

1: **function** COMPRESSEDSENSING( $p : \mathbb{R}^d \rightarrow \mathbb{R}, x_0 \in \mathbb{R}^d, y \in \mathbb{R}^m, A \in \mathbb{R}^{m \times d}, \eta, R \in \mathbb{R}$ )  
2:   Let  $\sigma = R/\delta$ .  
3:   Sample  $x'_0 = x_0 + \mathcal{N}(0, \sigma^2 I_d)$ .  
4:   Use [Algorithm 2](#), return

GAUSSIANSAMPLER( $p, x'_0, y, A, \eta, \sigma$ )

5: **end function**

---

1290 *Proof.* Combining [Corollary E.10](#) with [Lemma E.16](#) enables us to apply [Lemma E.14](#) and proves  
1291 the lemma.  $\square$

1292 Expressing this in expectation, we have the following theorem.

1293 **Theorem E.18** (Posterior sampling with local log-concavity). *For any  $\varepsilon, \tau, R, L > 0$ , suppose  $p(x)$   
1294 is a distribution over  $\mathbb{R}^d$  such that*

$$\Pr_{x' \sim p} [\forall x \in B(x', R) : -LI_d \preceq \nabla^2 \log p(x) \preceq (\tau^2/R^2)I_d] \geq 1 - \varepsilon.$$

1295 *Let  $\rho = \frac{\|A\|\sigma}{\eta}$ . There exists*

$$K \leq \tilde{O} \left( \frac{1}{\varepsilon \delta} \left( \frac{\rho^2 ((m^2 \rho^4 + 1) d^3 + m^3 \rho^2 + dm)}{\sqrt{m}} + \frac{m}{d} + \log d \right) \right).$$

1296 *such that: given a Gaussian measurement  $x_0 = x + \mathcal{N}(0, \sigma^2 I_d)$  of  $x \sim p$  with  $R^2 \geq (\frac{K\sqrt{m}}{\rho^2} + 4\tau)\sigma^2$ ,  
1297 and  $\varepsilon_{\text{score}} \leq \frac{1}{K^2 \sqrt{m} \sigma}$ ; then [Algorithm 2](#) samples from a distribution  $\hat{p}(x \mid x_0, y)$  such that*

$$\mathbb{E}_{x_0, y} [\text{TV}(\hat{p}(x \mid x_0, y), p(x \mid x_0, y))] \lesssim \varepsilon.$$

1298 *Furthermore, the total iteration complexity can be bounded by*

$$\tilde{O} \left( K^3 (K^2 m^2 d + m^3 \rho + m^{1.5} (m \rho^2 + 1) \sqrt{d}) (L \sigma^2 + \rho^2 + 1)^2 + K^3 m^2 \rho (L \sigma^2 + \rho^2 + 1) \right).$$

1299 This gives us [Theorem 1.2](#):

1300 **Theorem 1.2** (Posterior sampling with local log-concavity). *For any  $\varepsilon, \tau, R, L > 0$ , suppose  $p(x)$   
1301 is a distribution over  $\mathbb{R}^d$  such that*

$$\Pr_{x' \sim p} [\forall x \in B(x', R) : -LI_d \preceq \nabla^2 \log p(x) \preceq (\tau^2/R^2)I_d] \geq 1 - \varepsilon.$$

1302 *Then, there exists  $K_1, K_2 = \text{poly}(d, m, \frac{\|A\|\sigma}{\eta}, \frac{1}{\varepsilon})$  and  $K_3 = \text{poly}(d, m, \frac{\|A\|\sigma}{\eta}, \frac{1}{\varepsilon}, L \sigma^2)$  such that:*

1303 *Given a Gaussian measurement  $x_0 = x + \mathcal{N}(0, \sigma^2 I_d)$  of  $x \sim p$  with  $\sigma \leq R/(K_1 + 2\tau)$ . If  
1304  $\varepsilon_{\text{score}} \leq \frac{1}{K_2 \sigma}$ , then there exists an algorithm that takes  $K_3$  iterations to sample from a distribution*

1305  *$\hat{p}(x \mid x_0, y)$  such with*

$$\mathbb{E}_{y, x_0} [\text{TV}(\hat{p}(x \mid x_0, y), p(x \mid x_0, y))] \lesssim \varepsilon.$$

### 1306 E.3 Compressed Sensing

1307 In this section, we prove [Corollary 1.3](#). We first describe the sampling procedure in [Algorithm 3](#).

1308 Now we verify its correctness.

1309 **Lemma E.19.** *For any  $\delta, \tau, R, R', L > 0$ , suppose  $p(x)$  is a distribution over  $\mathbb{R}^d$  such that*

$$\Pr_{x' \sim p} [\forall x \in B(x', R') : -LI_d \preceq \nabla^2 \log p(x) \preceq (\tau/R')^2 I_d] \geq 1 - \delta.$$

1310 *Let  $\rho = \frac{\|A\|R}{\eta}$ . There exists*

$$K \leq \tilde{O} \left( \frac{1}{\delta^2} \left( \frac{\rho^2 ((m^2 \rho^4 + 1) d^3 + m^3 \rho^2 + dm)}{\sqrt{m}} + \frac{m}{d} + \log d \right) \right).$$

1311 such that: suppose  $(R')^2 \geq (\frac{K\sqrt{m}}{\rho^2} + 4\tau)R^2$  and  $\varepsilon_{score} \leq \frac{1}{K^2\sqrt{m}R}$ , then conditioned on  $\|x_0 - x\| \leq$   
 1312  $R$ , [Line 4 of Algorithm 3](#) samples from a distribution  $\hat{p}$  (depending on  $x'_0$  and  $y$ ) such that

$$\Pr_{x'_0, y} [\text{TV}(\hat{p}, p(x \mid x + \mathcal{N}(0, \sigma^2 I_d) = x'_0, Ax + \xi = y)) \leq \delta] \geq 1 - O(\delta).$$

1313 Furthermore, the total iteration complexity can be bounded by

$$\tilde{O} \left( K^3(K^2m^2d + m^3\rho + m^{1.5}(m\rho^2 + 1)\sqrt{d})(L\sigma^2 + \rho^2 + 1)^2 + K^3m^2\rho(L\sigma^2 + \rho^2 + 1) \right).$$

1314 *Proof.* This is a direct application of [Lemma E.17](#). The sole difference is that  $x'_0$  follows  $x_0 +$   
 1315  $\mathcal{N}(0, \sigma^2 I_d)$  instead of  $x + \mathcal{N}(0, \sigma^2 I_d)$ . Because  $\|x_0 - x\| \leq R$ ,  $x'_0$  remains sufficiently close to  $x$   
 1316 for the local Hessian condition to hold, so the proof of [Lemma E.17](#) carries over verbatim.  $\square$

1317 Now we explain why we want to sample from  $p(x \mid x + \mathcal{N}(0, \sigma^2 I_d) = x'_0, Ax + \xi = y)$ . Essentially,  
 1318 the extra Gaussian measurement won't hurt the concentration of  $p(x \mid y)$  itself. We abstract it as the  
 1319 following lemma:

1320 **Lemma E.20.** Let  $(X, Y)$  be jointly distributed random variables with  $X \in \mathbb{R}^d$ . Assume that for  
 1321 some  $r > 0$  and  $0 < \delta < 1$

$$\Pr_{Y, \hat{X} \sim p(X|Y)} [\|X - \hat{X}\| \leq r] \geq 1 - \delta.$$

1322 Define  $Z = X + \varepsilon$  where  $\varepsilon \sim \mathcal{N}(0, \sigma^2 I_d)$  is independent of  $(X, Y)$ . If

$$\sigma \geq \frac{r}{2\delta},$$

1323 then for  $\hat{X} \sim p(X \mid Y, Z)$  one has

$$\Pr_{Y, Z, \hat{X}} [\|X - \hat{X}\| \leq r] \geq 1 - 3\delta.$$

1324 *Proof.* Fix  $Y$  and draw an auxiliary point  $\tilde{X} \sim p(X \mid Y)$ . Let  $Z' = \tilde{X} + \varepsilon'$  with  $\varepsilon' \sim \mathcal{N}(0, \sigma^2 I_d)$   
 1325 independent of everything else. On the event

$$E = \{\|X - \tilde{X}\| \leq r\},$$

1326  $Z$  and  $Z'$  are Gaussians with the same covariance  $\sigma^2 I_d$  and means  $X$  and  $\tilde{X}$ . Pinsker's inequality  
 1327 combined with the KL divergence between the two Gaussians gives

$$\text{TV}(\mathcal{N}(X, \sigma^2 I_d), \mathcal{N}(\tilde{X}, \sigma^2 I_d)) \leq \frac{\|X - \tilde{X}\|}{2\sigma} \leq \frac{r}{2\sigma} \leq \delta.$$

1328 Hence

$$\text{TV}(\mathcal{L}(Y, X, Z), \mathcal{L}(Y, X, Z')) \leq \Pr[E^c] + \delta \leq 2\delta,$$

1329 because  $\Pr[E^c] \leq \delta$  by the hypothesis on  $p(X \mid Y)$ .

1330 By construction,

$$p(X \mid Y) = \mathbb{E}_{Z'|Y}[p(X \mid Y, Z')],$$

1331 so

$$\Pr_{Y, Z', \hat{X} \sim p(X|Y, Z')} [\|X - \hat{X}\| \leq r] \geq 1 - \delta.$$

1332 For the set  $A = \{(Y, Z, \hat{X}) : \|X - \hat{X}\| > r\}$  the total-variation bound gives

$$|\Pr_{Y, Z, \hat{X}}[A] - \Pr_{Y, Z', \hat{X}}[A]| \leq 2\delta,$$

1333 whence

$$\Pr_{Y, Z, \hat{X}} [\|X - \hat{X}\| \leq r] \geq 1 - \delta - 2\delta = 1 - 3\delta. \quad \square$$

1334 This implies the following lemma:

1335 **Lemma E.21.** Consider the random variables in [Algorithm 3](#). Suppose that

- 1336 • Information theoretically, it is possible to recover  $\hat{x}$  from  $y$  satisfying  $\|\hat{x} - x\| \leq r$  with
- 1337 probability  $1 - \delta$  over  $x \sim p$  and  $y$ .
- 1338 •  $\Pr[\|x_0 - x\| \leq R] \geq 1 - \delta$ .

1339 Then drawing sample  $\hat{x} \sim p(x \mid x + \mathcal{N}(0, \sigma^2 I_d) = x'_0, Ax + \xi = y)$  would give that

$$\Pr[\|x - \hat{x}\| \leq 2r] \geq 1 - O(\delta).$$

1340 *Proof.* By [\[JAD<sup>+</sup>21\]](#), the first condition implies that,

$$\Pr_{x, y, \hat{x} \sim p(x|y)}[\|x - \hat{x}\| \leq 2r] \geq 1 - 2\delta.$$

1341 Then by [Lemma E.20](#), suppose we have  $x' = x + \mathcal{N}(0, \sigma^2 I_d)$ , then

$$\Pr_{x, y, \hat{x} \sim p(x|y, x + \mathcal{N}(0, \sigma^2 I_d) = x')}[\|x - \hat{x}\| \leq 2r] \geq 1 - 6\delta.$$

1342 Note that whenever  $\|x - x_0\| \leq r$ , we have

$$\text{TV}(x' \mid x, x_0, x'_0 \mid x, x_0) \leq \delta.$$

1343 This proves that

$$\Pr_{x, y, \hat{x} \sim p(x|y, x + \mathcal{N}(0, \sigma^2 I_d) = x'_0)}[\|x - \hat{x}\| \leq 2r] \geq 1 - 6\delta.$$

1344 □

1345 **Lemma E.22.** Consider attempting to accurately reconstruct  $x$  from  $y = Ax + \xi$ . Suppose that:

- 1346 • Information theoretically, it is possible to recover  $\hat{x}$  from  $y$  satisfying  $\|\hat{x} - x\| \leq r$  with
- 1347 probability  $1 - \delta$  over  $x \sim p$  and  $y$ .
- 1348 • We have access to a “naive” algorithm that recovers  $x_0$  from  $y$  satisfying  $\|x_0 - x\| \leq R$
- 1349 with probability  $1 - \delta$  over  $x \sim p$  and  $y$ .

1350 Let  $\rho = \frac{\|A\|_R}{\eta\delta}$ . There exists

$$K \leq \tilde{O}\left(\frac{1}{\delta^2} \left(\frac{\rho^2((m^2\rho^4 + 1)d^3 + m^3\rho^2 + dm)}{\sqrt{m}} + \frac{m}{d} + \log d\right)\right).$$

1351 such that: suppose for  $R' = (R/\delta) \cdot \sqrt{\frac{K\sqrt{m}}{\rho^2} + 4\tau}$ ,

$$\Pr_{x' \sim p}[\forall x \in B(x', R') : -LI_d \preceq \nabla^2 \log p(x) \preceq (\tau/R')^2 I_d] \geq 1 - \delta.$$

1352 Then we give an algorithm that recovers  $\hat{x}$  satisfying  $\|\hat{x} - x\| \leq 2r$  with probability  $1 - O(\delta)$ , in

1353  $\text{poly}(d, m, \frac{\|A\|_R}{\eta}, \frac{1}{\delta})$  time, under [Assumption 1](#) with  $\varepsilon_{\text{score}} < \frac{1}{K^2\sqrt{m}(R/\delta)}$ .

1354 *Proof.* By our assumption and [Lemma E.19](#), we have that we are sampling from  $p(x \mid x +$   
 1355  $\mathcal{N}(0, \sigma^2 I_d) = x'_0, Ax + \xi = y)$  with  $\delta$  TV error with  $1 - O(\delta)$  probability. By [Lemma E.21](#),  
 1356 this would recover  $x$  within distance  $2r$  with  $1 - O(\delta)$  probability. Combining the two gives the  
 1357 result. □

1358 Setting  $\tau = 0$  would give [Corollary 1.3](#) as a corollary.

1359 **Corollary 1.3** (Competitive compressed sensing). Consider attempting to accurately reconstruct  $x$   
 1360 from  $y = Ax + \xi$ . Suppose that:

- 1361 • Information theoretically (but possibly requiring exponential time or using exact knowledge
- 1362 of  $p(x)$ ), it is possible to recover  $\hat{x}$  from  $y$  satisfying  $\|\hat{x} - x\| \leq r$  with probability  $1 - \delta$
- 1363 over  $x \sim p$  and  $y$ .



- We have access to a “naive” algorithm that recovers  $x_0$  from  $y$  satisfying  $\|x_0 - x\| \leq R$  with probability  $1 - \delta$  over  $x \sim p$  and  $y$ .
- For  $R' = R \cdot \text{poly}(d, m, \frac{\|A\|_R}{\eta}, \frac{1}{\delta})$ ,

$$\Pr_{x' \sim p} [\forall x \in B(x', R') : -LI_d \preceq \nabla^2 \log p(x) \preceq 0] \geq 1 - \delta.$$

Then we give an algorithm that recovers  $\hat{x}$  satisfying  $\|\hat{x} - x\| \leq 2r$  with probability  $1 - O(\delta)$ , in  $\text{poly}(d, m, \frac{\|A\|_R}{\eta}, \frac{1}{\delta})$  time, under Assumption 1 with  $\varepsilon_{\text{score}} < \frac{1}{\text{poly}(d, m, \frac{\|A\|_R}{\eta}, \frac{1}{\delta}, LR^2)R}$ .

#### E.4 Ring example

Let  $w \in (0, 0.01)$  and let  $p_0$  be the uniform probability measure on the unit circle  $S^1 = \{x \in \mathbb{R}^2 : \|x\| = 1\}$ . Define the *circle-Gaussian mixture*

$$p(x) = (p_0 * \mathcal{N}(0, w^2 I_2))(x) = \frac{1}{2\pi} \int_0^{2\pi} \frac{1}{2\pi w^2} \exp\left(-\frac{\|x - (\cos \theta, \sin \theta)\|^2}{2w^2}\right) d\theta, \quad x \in \mathbb{R}^2.$$

In this section, we will verify that

**Lemma E.23.** For any  $x \in \mathbb{R}^2$  with radius  $r = \|x\| > 0$ , the Hessian of the log-density satisfies

$$\nabla^2 \log p(x) \preceq \begin{cases} (\frac{1}{2w^4} - \frac{1}{w^2})I_2, & 0 < r \leq w^2, \\ (\frac{1}{w^2 r} - \frac{1}{w^2})I_2, & w^2 < r \leq 1, \\ 0, & r > 1. \end{cases}$$

*Proof.* Rotational invariance gives  $p(x) = p(r)$  with

$$p(r) = \frac{1}{2\pi w^2} \exp\left(-\frac{r^2 + 1}{2w^2}\right) I_0\left(\frac{r}{w^2}\right), \quad r \geq 0.$$

Write  $f(r) = \log p(r)$  and set  $z = r/w^2 > 0$ . Using  $I_0'(z) = I_1(z)$ , we get the first and second derivatives:

$$f'(r) = \frac{-r + I_1(z)/I_0(z)}{w^2}, \quad f''(r) = -\frac{1}{w^2} + \frac{I_0(z)I_2(z) - I_1(z)^2}{w^4 I_0(z)^2}.$$

For  $r > 0$ , the eigenvalues of  $\nabla^2 \log p$  are

$$\lambda_r(r) = f''(r), \quad \lambda_t(r) = \frac{f'(r)}{r}.$$

The Turán inequality  $I_1(z)^2 - I_0(z)I_2(z) \geq 0$  implies  $\lambda_r(r) \leq -1/w^2$ ; thus, the largest eigenvalue is  $\lambda_t(r)$ .

Since  $I_1(z)/I_0(z) \leq 1$  for all  $z > 0$  and  $I_1(z)/I_0(z) \leq z/2$  for  $0 < z \leq 1$ ,

$$\lambda_t(r) = -\frac{1}{w^2} + \frac{1}{w^2 r} \frac{I_1(z)}{I_0(z)} \leq \begin{cases} -\frac{1}{w^2} + \frac{1}{2w^4}, & 0 < r \leq w^2, \\ -\frac{1}{w^2} + \frac{1}{w^2 r}, & w^2 < r \leq 1, \\ 0, & r > 1. \end{cases}$$

□

**Lemma E.24.** For every  $x \in \mathbb{R}^2$ , we have

$$\nabla^2 \log p(x) \succeq -\frac{1}{w^2} I_2.$$

1383 *Proof.* Write  $u = (\cos \theta, \sin \theta)$  and

$$p(x) = \frac{1}{2\pi} \int_0^{2\pi} \frac{1}{2\pi w^2} e^{-\|x-u\|^2/(2w^2)} d\theta.$$

1384 Differentiating under the integral gives

$$\nabla p(x) = \int \left( -\frac{x-u}{w^2} \right) \frac{1}{2\pi} \frac{1}{2\pi w^2} e^{-\|x-u\|^2/(2w^2)} d\theta = -\frac{1}{w^2} p(x) (x - \mathbb{E}[u | x]),$$

1385 so

$$\nabla \log p(x) = -\frac{x - \mathbb{E}[u | x]}{w^2}.$$

1386 Differentiating once more,

$$\nabla^2 \log p(x) = -\frac{I_2}{w^2} + \frac{1}{w^2} \nabla \mathbb{E}[u | x].$$

1387 A standard score–covariance identity shows

$$\nabla \mathbb{E}[u | x] = \text{Cov}_{u|x}(u, \frac{x-u}{w^2}) = \frac{1}{w^2} \text{Cov}_{u|x}(u),$$

1388 hence

$$\nabla^2 \log p(x) = \frac{\text{Cov}_{u|x}(u)}{w^4} - \frac{I_2}{w^2}.$$

1389 Since  $\text{Cov}_{u|x}(u) \succeq 0$ , it follows that

$$\nabla^2 \log p(x) \succeq -\frac{1}{w^2} I_2,$$

1390 as claimed. □

1391 **Lemma E.25.** For any  $w \in (0, 1/2)$ , we have that

$$\Pr_{x' \sim p} \left[ \forall x \in B(x', 1/2) : -\frac{1}{w^2} I_d \preceq \nabla^2 \log p(x) \preceq \frac{1}{2w^2} I_d \right] \geq 1 - e^{-\Omega(1/w^2)}.$$

1392 *Proof.* Note that

$$\Pr_{x \sim p} [\|x\| > 3/4] \geq 1 - e^{-\Omega(1/w^2)}.$$

1393 The rest follows by combining [Lemma E.23](#) and [Lemma E.24](#). □

1394 Hence, we can apply [Theorem 1.2](#) on our ring distribution  $p$  and get the following corollary:

1395 **Corollary E.26.** Let  $A \in \mathbb{R}^{C \times 2}$  be a matrix for some constant  $C > 0$ . Consider  $x \sim p$  with two  
1396 measurements given by

$$x_0 = x + N(0, \sigma^2 I_2) \quad \text{and} \quad y = Ax + N(0, \eta^2 I_2).$$

1397 Suppose  $\|A\|w/\eta = O(1)$ . Then, if  $\sigma \leq cw$  and  $\varepsilon_{\text{score}} \leq cw^{-1}$  for sufficiently small constant  
1398  $c > 0$ , [Algorithm 2](#) takes a constant number of iterations to sample from a distribution  $\hat{p}(x | x_0, y)$   
1399 such that

$$\mathbb{E}_{x_0, y} [\text{TV}(\hat{p}(x | x_0, y), p(x | x_0, y))] < 0.01.$$

## 1400 E.5 Deferred Proof

1401 **Lemma E.8.** Let  $X, Y$ , and  $Z$  be random vectors in  $\mathbb{R}^d$ , where  $Y = X + N(0, \sigma_1^2 I_d)$  and  $Z =$   
1402  $X + N(0, \sigma_2^2 I_d)$ . The conditional density of  $Z$  given  $Y$ , denoted  $p(Z | Y)$ , is a multivariate normal  
1403 distribution with mean

$$\mu_{Z|Y} = \sigma_2^2 (\sigma_1^2 + \sigma_2^2)^{-1} Y$$

1404 and covariance matrix

$$\Sigma_{Z|Y} = \sigma_2^2 (\sigma_1^2 + \sigma_2^2)^{-1} \sigma_1^2.$$

1405 Then, the gradient of the log-likelihood  $\log p(Z | Y)$  with respect to  $Y$  is given by

$$\nabla_Y \log p(Z | Y) = -\frac{1}{\sigma_1^2} (Z - \sigma_2^2 (\sigma_1^2 + \sigma_2^2)^{-1} Y).$$

1406 *Proof.* Since  $Z | Y \sim \mathcal{N}(\mu_{Z|Y}, \Sigma_{Z|Y})$ , the log-likelihood function is

$$\log p(Z | Y) = -\frac{1}{2} \left( (Z - \mu_{Z|Y})^T \Sigma_{Z|Y}^{-1} (Z - \mu_{Z|Y}) + \log \det(\Sigma_{Z|Y}) + d \log(2\pi) \right).$$

1407 To compute the gradient with respect to  $Y$ , we focus on the term involving  $\mu_{Z|Y}$ :

$$-\frac{1}{2} \left( (Z - \mu_{Z|Y})^T \Sigma_{Z|Y}^{-1} (Z - \mu_{Z|Y}) \right).$$

1408 Differentiating with respect to  $Y$  gives:

$$\nabla_Y \left[ (Z - \mu_{Z|Y})^T \Sigma_{Z|Y}^{-1} (Z - \mu_{Z|Y}) \right] = -2 \Sigma_{Z|Y}^{-1} (Z - \mu_{Z|Y}) \cdot \nabla_Y \mu_{Z|Y}.$$

1409 Since  $\mu_{Z|Y} = \sigma_2^2(\sigma_1^2 + \sigma_2^2)^{-1}Y$ , we have

$$\nabla_Y \mu_{Z|Y} = \sigma_2^2(\sigma_1^2 + \sigma_2^2)^{-1}.$$

1410 Thus, the gradient becomes

$$\nabla_Y \log p(Z | Y) = -\Sigma_{Z|Y}^{-1} (Z - \mu_{Z|Y}) \cdot \sigma_2^2(\sigma_1^2 + \sigma_2^2)^{-1}.$$

1411 Substituting the inverse of the covariance matrix  $\Sigma_{Z|Y}$ , we get

$$\Sigma_{Z|Y}^{-1} = \frac{1}{\sigma_1^2} (\sigma_1^2 + \sigma_2^2),$$

1412 and the final expression for the gradient is

$$\nabla_Y \log p(Z | Y) = -\frac{1}{\sigma_1^2} (Z - \sigma_2^2(\sigma_1^2 + \sigma_2^2)^{-1}Y).$$

1413

□

1414 **Lemma E.12.** Let  $p$  be a probability density on  $\mathbb{R}^d$ . Fix  $0 < r < R$  and  $\theta \in \mathbb{R}^d$  such that

$$\Pr_{x \sim p}[x \in B(\theta, r)] \geq 0.9, \quad \nabla^2(-\log p(x)) \succeq \alpha I_d \quad (x \in B(\theta, R)), \quad \alpha > 0.$$

1415 If  $R > 4dr$ , then there exists  $\theta' \in B(\theta, 4dr)$  with  $\nabla \log p(\theta') = 0$ .

1416 *Proof.* By [Lemma B.13](#), there is a normalised density  $q$  satisfying  $\nabla \log q = \nabla \log p$  on  $B(\theta, R)$   
 1417 and such that  $\log q$  is  $\alpha$ -strongly concave on  $\mathbb{R}^d$ . The difference  $\log p - \log q$  is therefore constant  
 1418 on  $B(\theta, R)$ ; hence

$$p(x) = C q(x) \quad (x \in B(\theta, R))$$

1419 for some  $C > 0$ .

1420 Let  $\mu = \arg \max q$ ; strong concavity gives  $\nabla \log q(\mu) = 0$  and uniqueness of  $\mu$ . Assume for  
 1421 contradiction that  $\|\mu - \theta\| \geq 4dr$ . Set  $\lambda = 2r/\|\mu - \theta\| \leq 1/(2d)$  and define

$$\tau(x) = (1 - \lambda)x + \lambda\mu.$$

1422 Then  $\det D\tau = (1 - \lambda)^d$  and  $\tau(B(\theta, r)) = B(\theta', (1 - \lambda)r)$  with  $\theta' = \tau(\theta) \in B(\theta, R)$ . Along  
 1423 any ray starting at  $\mu$  the function  $t \mapsto \log q(\mu + t(x - \mu))$  is strictly decreasing for  $t \geq 0$ ; hence  
 1424  $q(\tau(x)) \geq q(x)$  for every  $x$ .

1425 A change of variables yields

$$\Pr_q[B(\theta', (1 - \lambda)r)] = \int_{B(\theta, r)} q(\tau(x))(1 - \lambda)^d dx \geq (1 - \lambda)^d \Pr_q[B(\theta, r)].$$

1426 Because  $\lambda \leq 1/(2d)$ ,  $(1 - \lambda)^d \geq e^{-1/2} > 0.6$ . Multiplying by  $C$  and using  $p = Cq$  on  $B(\theta, R)$   
 1427 gives

$$\Pr_p[B(\theta', (1 - \lambda)r)] \geq 0.6 \Pr_p[B(\theta, r)] \geq 0.54.$$

1428 The two balls  $B(\theta, r)$  and  $B(\theta', (1 - \lambda)r)$  are disjoint, so  $1 \geq 0.9 + 0.54$ , a contradiction. Thus  
 1429  $\|\mu - \theta\| < 4dr$ .

1430 Because  $4dr < R$  we have  $\mu \in B(\theta, R)$  and here  $\nabla \log p = \nabla \log q$ ; consequently  $\nabla \log p(\mu) = 0$ .  
 1431 Putting  $\theta' = \mu$  completes the proof. □

1432 **Lemma E.15.** Let  $p$  be a distribution on  $\mathbb{R}^d$ . Let  $\tilde{x} = x_{\text{true}} + N(0, \sigma^2 I_d)$  be a Gaussian measure-  
 1433 ment of  $x_{\text{true}} \sim p$ . Let  $p_{\tilde{x}}(x)$  be the posterior distribution of  $x$  given  $\tilde{x}$ . Then, for any  $\delta \in (0, 1)$   
 1434 and  $\delta' \in (0, 1)$ , with probability at least  $1 - \delta'$  over  $\tilde{x}$ ,

$$\Pr_{x \sim p_{\tilde{x}}} [x \in B(\tilde{x}, r)] \geq 1 - \delta$$

1435 for  $r = \sigma(\sqrt{d} + \sqrt{2 \log \frac{1}{\delta \delta'}})$ .

1436 *Proof.* Let  $Q(\tilde{x}) = \Pr_{x \sim p_{\tilde{x}}} [\|x - \tilde{x}\| > r]$ . We want to show that with probability at least  $1 - \delta'$  over  
 1437  $\tilde{x}$ ,  $Q(\tilde{x}) \leq \delta$ . This is equivalent to showing that  $\Pr_{\tilde{x}}[Q(\tilde{x}) > \delta] \leq \delta'$ .

1438 We use Markov's inequality. For any  $\delta > 0$ :

$$\Pr_{\tilde{x}}[Q(\tilde{x}) > \delta] \leq \frac{\mathbb{E}_{\tilde{x}}[Q(\tilde{x})]}{\delta}.$$

1439 Thus, it suffices to show that  $\mathbb{E}_{\tilde{x}}[Q(\tilde{x})] \leq \delta \delta'$ .

1440 Let's compute  $\mathbb{E}_{\tilde{x}}[Q(\tilde{x})]$ :

$$\begin{aligned} \mathbb{E}_{\tilde{x}}[Q(\tilde{x})] &= \mathbb{E}_{\tilde{x}} \left[ \int_{\|x_1 - \tilde{x}\| > r} p(x_1 \mid \tilde{x}) dx_1 \right] \\ &= \int p(\tilde{x}) \left( \int_{\|x_1 - \tilde{x}\| > r} p(x_1 \mid \tilde{x}) dx_1 \right) d\tilde{x} \\ &= \int \left( \int_{\|x_1 - \tilde{x}\| > r} p(x_1, \tilde{x}) dx_1 \right) d\tilde{x}. \end{aligned}$$

1441 Using  $p(x_1, \tilde{x}) = p(\tilde{x} \mid x_1)p(x_1)$ , we can change the order of integration:

$$\mathbb{E}_{\tilde{x}}[Q(\tilde{x})] = \int p(x_1) \left( \int_{\|\tilde{x} - x_1\| > r} p(\tilde{x} \mid x_1) d\tilde{x} \right) dx_1.$$

1442 Given  $x_1$ , the distribution of  $\tilde{x}$  is  $N(x_1, \sigma^2 I_d)$ . Let  $Z = \tilde{x} - x_1$ . Then  $Z \sim N(0, \sigma^2 I_d)$ . The inner  
 1443 integral is  $\Pr_{Z \sim N(0, \sigma^2 I_d)} [\|Z\| > r]$ . Let  $W = Z/\sigma$ . Then  $W \sim N(0, I_d)$ . The inner integral be-  
 1444 comes  $P_G(r/\sigma) = \Pr_{W \sim N(0, I_d)} [\|W\| > r/\sigma]$ . So,  $\mathbb{E}_{\tilde{x}}[Q(\tilde{x})] = \int p(x_1) P_G(r/\sigma) dx_1 = P_G(r/\sigma)$ .

1445 We need to show  $P_G(r/\sigma) \leq \delta \delta'$ . We use the standard Gaussian concentration inequality: for  
 1446  $W \sim N(0, I_d)$  and  $t \geq 0$ ,

$$\Pr[\|W\| \geq \sqrt{d} + t] \leq e^{-t^2/2}.$$

1447 We want  $P_G(r/\sigma) \leq \delta \delta'$ . So we set  $e^{-t^2/2} = \delta \delta'$ . This implies  $t^2/2 = \log(1/(\delta \delta'))$ , so  
 1448  $t = \sqrt{2 \log(1/(\delta \delta'))}$ . This choice of  $t$  is real and non-negative since  $\delta, \delta' \in (0, 1)$  implies  
 1449  $\delta \delta' \in (0, 1)$ , so  $\log(1/(\delta \delta')) \geq 0$ . We set  $r/\sigma = \sqrt{d} + t = \sqrt{d} + \sqrt{2 \log(1/(\delta \delta'))}$ . Thus, for  
 1450  $r = \sigma \left( \sqrt{d} + \sqrt{2 \log \frac{1}{\delta \delta'}} \right)$ , we have  $P_G(r/\sigma) \leq \delta \delta'$ .

1451 With this choice of  $r$ , we have  $\mathbb{E}_{\tilde{x}}[Q(\tilde{x})] \leq \delta \delta'$ . By Markov's inequality,

$$\Pr_{\tilde{x}}[Q(\tilde{x}) > \delta] \leq \frac{\mathbb{E}_{\tilde{x}}[Q(\tilde{x})]}{\delta} \leq \frac{\delta \delta'}{\delta} = \delta'.$$

1452 This means that  $\Pr_{\tilde{x}}[Q(\tilde{x}) \leq \delta] \geq 1 - \delta'$ , which is the desired statement:

$$\Pr_{\tilde{x}} \left[ \Pr_{x \sim p_{\tilde{x}}} [\|x - \tilde{x}\| \leq r] \geq 1 - \delta \right] \geq 1 - \delta'.$$

1453 □

## 1454 F Why Standard Langevin Dynamics Fails

1455 For a smooth density  $p$  on  $\mathbb{R}^d$  the overdamped Langevin SDE

$$\mathrm{d} X_t = \nabla \log p(X_t) \mathrm{d} t + \sqrt{2} \mathrm{d} B_t$$

1456 is ergodic with invariant law  $p$ . When the exact score  $\nabla \log p$  is replaced by an approximation,  
1457 however, the resulting dynamics can drift far from the target, because local score errors outside the  
1458 support of  $p$  are not uniformly controlled by global accuracy metrics.

1459 **Posterior target.** Suppose that  $x \sim p$  is observed through the linear Gaussian channel

$$y = Ax + \mathcal{N}(0, \eta^2 I_m), \quad 0 < \eta < \infty.$$

1460 The conditional (posterior) density of interest is

$$p_y(x) := p(x \mid Ax + \mathcal{N}(0, \eta^2 I_m) = y) \propto p(x) \exp\left(-\frac{1}{2\eta^2} \|Ax - y\|^2\right).$$

1461 A natural attempt to sample from  $p_y$  is to run

$$\mathrm{d} X_t = \left( \nabla \log p(X_t) + \eta^{-2} A^\top (y - AX_t) \right) \mathrm{d} t + \sqrt{2} \mathrm{d} B_t, \quad X_0 \sim p, \quad (13)$$

1462 hoping that averaging over  $y$  (i.e. over the forward model) will preserve the original law  $p$ . We now  
1463 show that this hope is unfounded even in the simplest one-dimensional Gaussian case.

### 1464 A one-dimensional counter-example

1465 Let  $p = \mathcal{N}(0, 1)$ ,  $A = 1$ , and  $y = x + \mathcal{N}(0, \eta^2)$ ; equivalently  $y \sim \mathcal{N}(0, 1 + \eta^2)$ . Then (13) reduces  
1466 to

$$\mathrm{d} X_t = \left( -X_t + \eta^{-2}(y - X_t) \right) \mathrm{d} t + \sqrt{2} \mathrm{d} B_t, \quad X_0 \sim \mathcal{N}(0, 1), \quad (14)$$

1467 an OU process with drift rate

$$\alpha := \frac{1 + \eta^2}{\eta^2} > 1.$$

1468 **Lemma F.1.** *Let  $X_t$  solve (14). Averaging over  $y$ ,  $X_t$  is Gaussian with mean 0 and variance*

$$\mathrm{Var}(X_t) = e^{-2\alpha t} + \frac{1 - e^{-2\alpha t}}{\alpha} + \frac{(1 - e^{-\alpha t})^2}{1 + \eta^2} \quad (\leq 1).$$

1469 *In particular  $\mathrm{Var}(X_t) = 1 - \frac{1}{2(1+\eta^2)}$  at the time  $t^* := \frac{\eta^2 \ln 2}{1 + \eta^2}$ .*

1470 *Proof.* Write the mild solution of (14):

$$X_t = X_0 e^{-\alpha t} + \eta^{-2} y \int_0^t e^{-\alpha(t-s)} \mathrm{d} s + \sqrt{2} \int_0^t e^{-\alpha(t-s)} \mathrm{d} B_s = X_0 e^{-\alpha t} + \frac{y}{\eta^2} \frac{1 - e^{-\alpha t}}{\alpha} + \sqrt{2} \int_0^t e^{-\alpha(t-s)} \mathrm{d} B_s.$$

1471 Because  $X_0, B$  are independent of  $y$ , conditional moments are

$$\mathbb{E}[X_t \mid y] = \frac{y}{\eta^2} \frac{1 - e^{-\alpha t}}{\alpha}, \quad \mathrm{Var}(X_t \mid y) = e^{-2\alpha t} + \frac{1 - e^{-2\alpha t}}{\alpha}.$$

1472 Applying the law of total variance with  $\mathrm{Var}(y) = 1 + \eta^2$  gives the stated formula.  $\square$

1473 Thus  $\mathrm{Var}(X_t)$  first *shrinks* below 1 (by a constant factor bounded away from 1 when  $\eta$  is small) be-  
1474 fore relaxing back to equilibrium. The phenomenon is harmless in one dimension but is catastrophic  
1475 in high dimension.

## 1476 High-dimensional amplification

1477 Let  $p = \mathcal{N}(0, I_d)$  and again take  $A = I_d$  with observation noise  $\eta^2 = 0.1$ . By rotational symmetry,  
 1478 each coordinate evolves as in Lemma F.1, so at time  $t^*$  the marginal law is

$$X_{t^*} \sim \mathcal{N}(0, \sigma^2 I_d), \quad \sigma^2 := 1 - \frac{1}{2(1+0.1)} \leq \frac{2}{3}.$$

1479 For any fixed  $0 < r < 1$  the likelihood ratio between the two Gaussians on the Euclidean ball  
 1480  $B_r := \{x : \|x\| \leq r\sqrt{d}\}$  is

$$\frac{\Pr_{x \sim \mathcal{N}(0, \sigma^2 I_d)}(x \in B_r)}{\Pr_{x \sim \mathcal{N}(0, I_d)}(x \in B_r)} = \frac{\mathbb{E}[\mathbf{1}_{\{x \in B_r\}} e^{-\frac{\|x\|^2}{2\sigma^2} + \frac{\|x\|^2}{2}}]}{\mathbb{E}[\mathbf{1}_{\{x \in B_r\}}]} \geq \sigma^{-d} \exp\left(-\frac{1}{2}(\sigma^{-2}-1)r^2 d\right) = \exp(\Omega(d)).$$

1481 Consequently:

1482 *A score estimator that is exponentially inaccurate on  $B_{0.1}$  can still achieve a small*  
 1483 *global  $L^p$  error under  $p$ , but as the dynamics evolves the probability of entering*  
 1484  *$B_{0.1}$  grows exponentially, and the error measured against the law of  $X_t$  becomes*  
 1485 *exponentially large.*

1486 This dimensional amplification is the precise sense in which the naive Langevin approach (13) is  
 1487 *not robust*: small local score errors that are negligible at  $t = 0$  become dominant at later times,  
 1488 invalidating convergence guarantees.

1489 Hence, the annealing technique we designed is necessary.

## 1490 G Experimental Details

1491 Our experiments are performed on the FFHQ 256 [KLA21] dataset, on 1k validation images, with  
 1492 the pre-trained diffusion model taken from [CKM<sup>+</sup>23]. Forward measurement operators are spec-  
 1493 ified as in [CKM<sup>+</sup>23] for our three tasks – (i) for inpainting, we randomly mask out between 30%  
 1494 and 70% of the pixels in the image, chosen uniformly at random, (ii) for super-resolution, we down-  
 1495 sample the image by a factor of 4, (iii) our Gaussian blur kernel has size  $61 \times 61$  with standard  
 1496 deviation of 3.0. The kernel is convolved with the ground truth images to produce the measure-  
 1497 ment.
